# Supplementary material for: Endothelial Function is improved by Inducing Microbial Polyamine Production in the Gut: A Randomized Placebo-Controlled Trial
Source: PubMed Central journal article supplement (PMC6566626; doi:10.3390/nu11051188), 2019-05-27
Supplement: nutrients-11-01188-s001.pdf [file nutrients-11-01188-s001.pdf]

# Supplemental Materials

## Endothelial Function is improved by Inducing Microbial Polyamine Production in the Gut: A Randomized Placebo-Controlled Trial

Mitsuharu Matsumoto <sup>1,\*</sup>, Yusuke Kitada <sup>1</sup>, and Yuji Naito <sup>2</sup>

<sup>1</sup> Dairy Science and Technology Institute, Kyodo Milk Industry Co. Ltd., Tokyo 190-0182, Japan;  
y-kitada@meito.co.jp

<sup>2</sup> Molecular Gastroenterology and Hepatology, Kyoto Prefectural University of Medicine, Kyoto 602-8566, Japan;  
ynaito@koto.kpu-m.ac.jp

\* Correspondence: m-matsumoto@meito.co.jp; Tel.:+81-42-597-5911

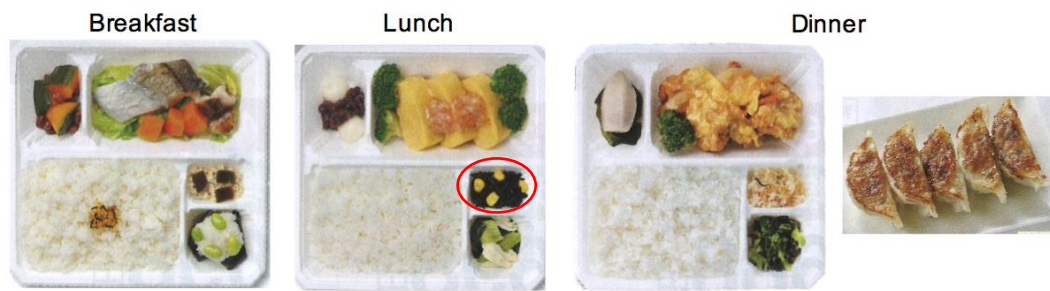

|           | Main menu                                                  | Calorie(kcal) | Protein(g) | Lipid(g) | Carbohydrate(g) | Dietary fiber(g) | Na(mg) | Total calories |
|-----------|------------------------------------------------------------|---------------|------------|----------|-----------------|------------------|--------|----------------|
| Breakfast | 1. Rice                                                    | 601           | 17.7       | 16.2     | 92.1            | 3.8              | 435    |                |
|           | 2. Cod and chinese cabbage with japanese style runny sauce |               |            |          |                 |                  |        |                |
|           | 3. Braised pumpkin                                         |               |            |          |                 |                  |        |                |
|           | 4. Deep-fried eggplant in Japanese broth                   |               |            |          |                 |                  |        |                |
| Lunch     | 1. Rice                                                    | 606           | 16.7       | 13.4     | 100.5           | 2.9              | 521    |                |
|           | 2. Japanese omelette with crab sauce                       |               |            |          |                 |                  |        |                |
|           | 3. Simmered Hijiki seaweed                                 |               |            |          |                 |                  |        |                |
|           | 4. Sticky rice flour dumplings                             |               |            |          |                 |                  |        |                |
| Dinner    | 1. Rice                                                    | 763           | 20.2       | 18.6     | 120.4           | 6.4              | 949    |                |
|           | 2. Fried chicken with egg soup                             |               |            |          |                 |                  |        |                |
|           | 3. Boiled spinach                                          |               |            |          |                 |                  |        |                |
|           | 4. Simmered taro                                           |               |            |          |                 |                  |        |                |
|           | 5. Panned dumpling                                         |               |            |          |                 |                  |        |                |
|           |                                                            |               |            |          |                 |                  |        | 1970 kcal      |

**Supplementary Figure S1.** Menu items and nutritional value of the prepared diet.

Hijiki, the marker for stool collection, is circled in red.

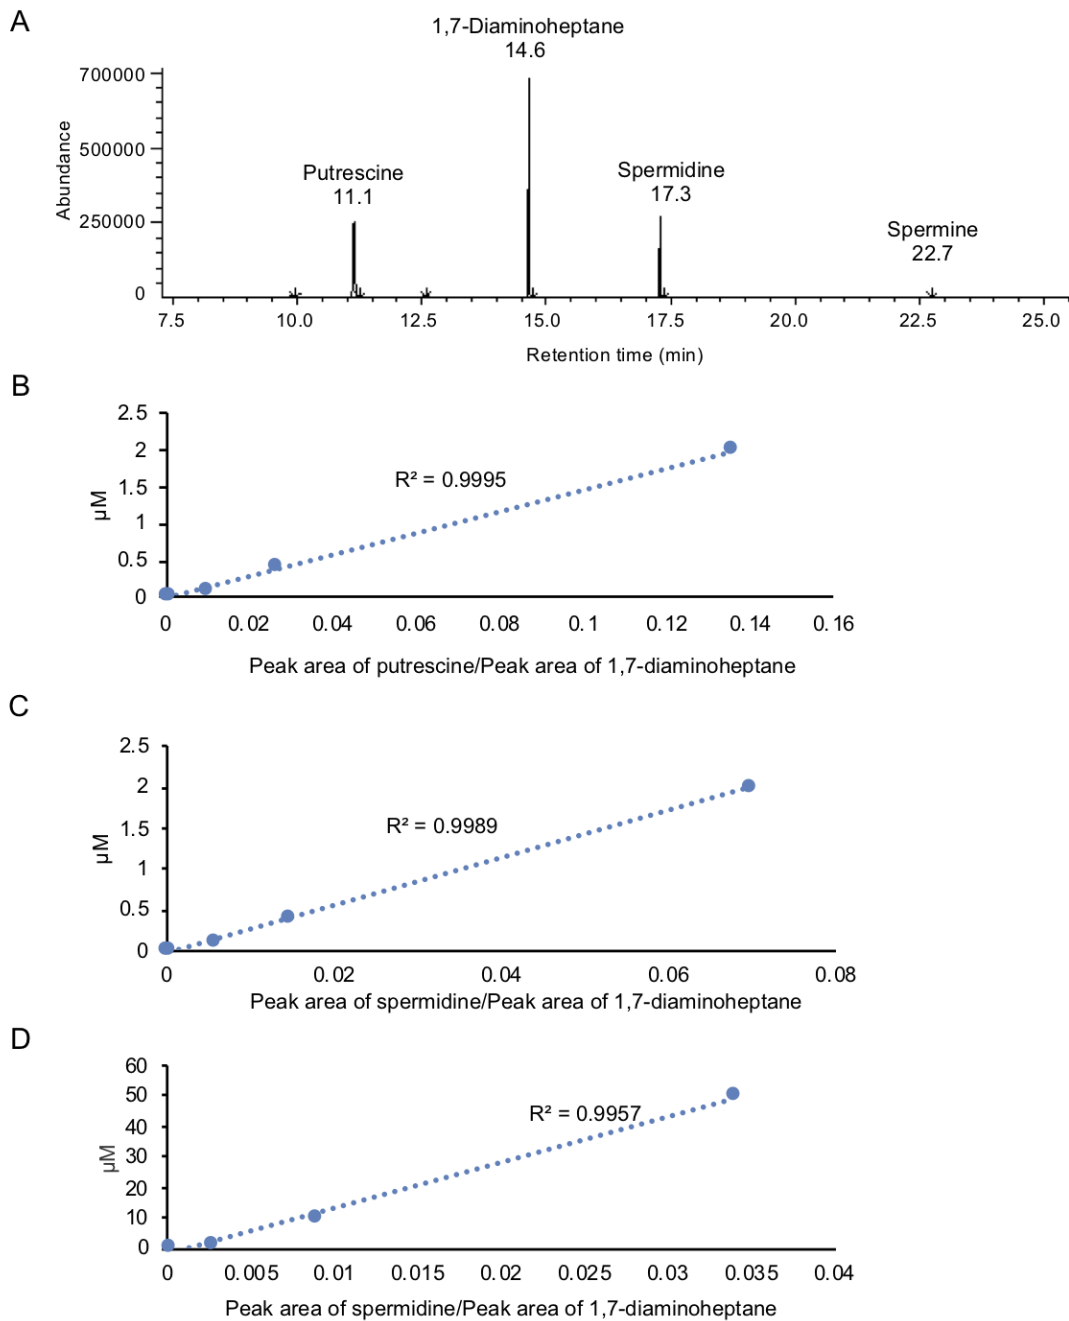

**Supplementary Figure S2.** Accuracy of the GC-MS polyamine measurements.

(A) Chromatogram and retention time of putrescine, 1,4-diaminoheptane, and spermidine. (B) Calibration curve of putrescine. (C) Calibration curve of spermidine. (D) Calibration curve of spermine. The retention times of putrescine, spermidine, spermine and 1,4-diaminoheptane were 11.1 min, 17.3 min, 22.7 min and 14.6 min, respectively. Calibration curves were prepared by correcting the area of the standards with the area of 1,4-diaminoheptane as an internal standard. The correlation coefficients ( $R^2$ ) of putrescine, spermidine, and spermine calibration curves were 0.9995, 0.9989 and 0.9957, respectively.

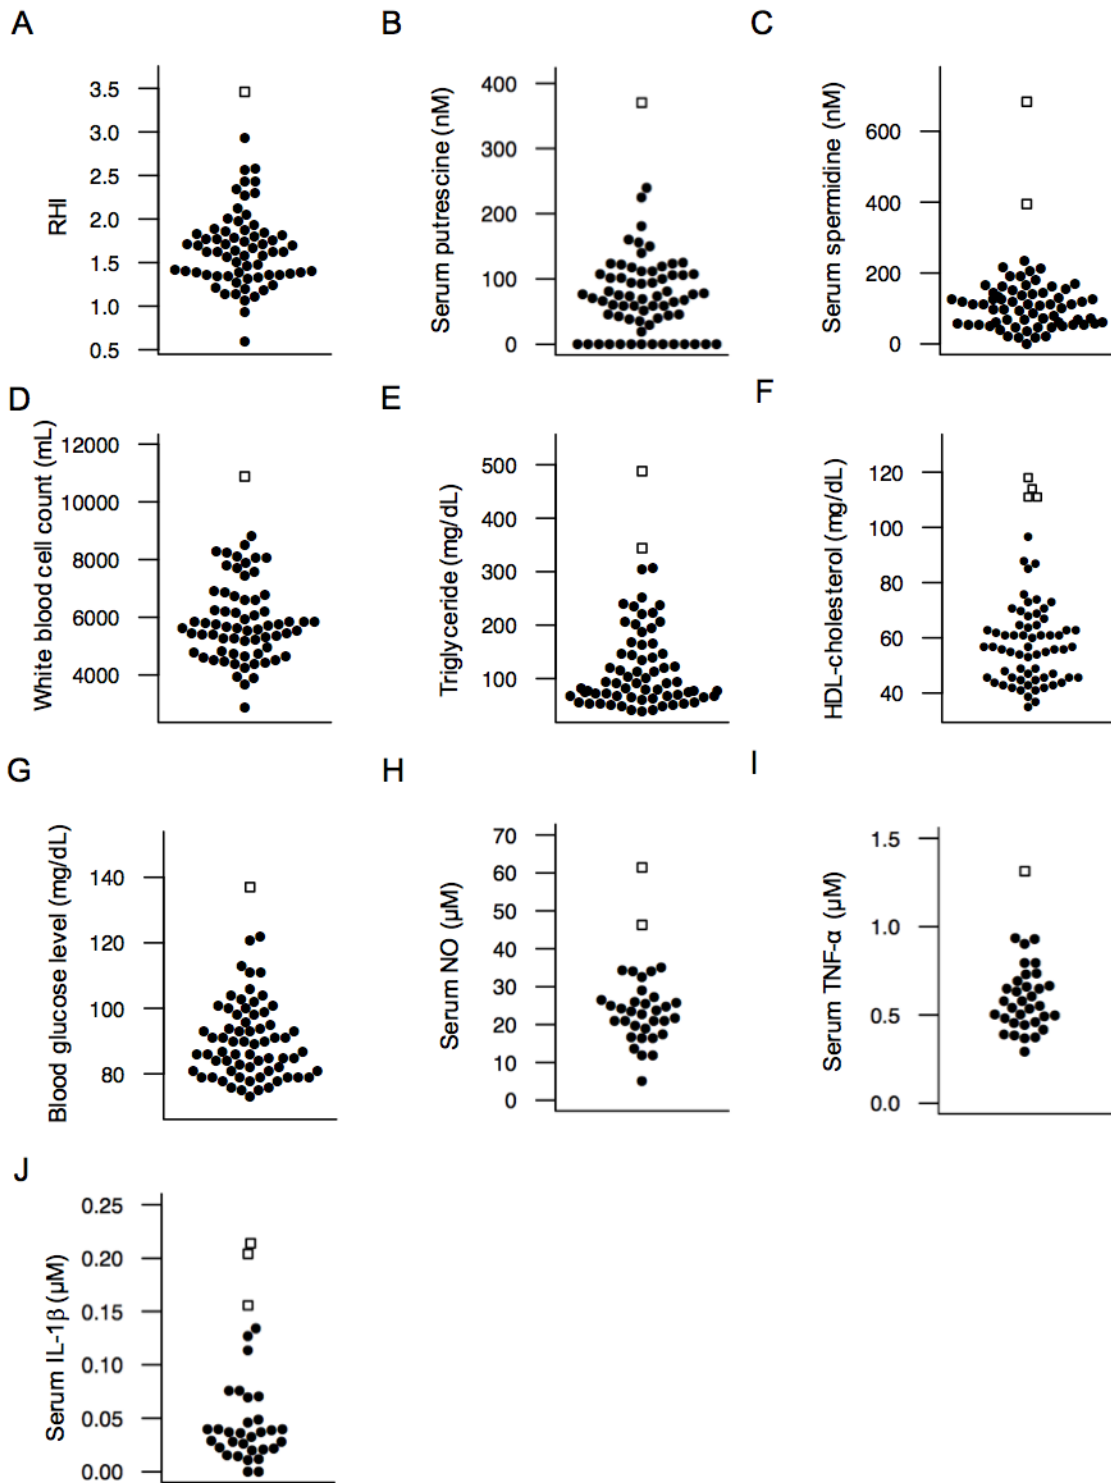

**Supplementary Figure S3.** Exclusion of outliers with the Smirnov–Grubbs test. The Smirnov-Grubbs test was performed on all subject data for each analysis: (A) RHI; (B) serum putrescine; (C) serum spermidine; (D) white blood cell count; (E) serum triglyceride; (F) serum high-density lipoprotein (HDL)-cholesterol; (G) blood glucose levels; (H) serum NO<sub>2</sub>/NO<sub>3</sub>; (I) serum TNF- $\alpha$ ; and (J) serum IL-1 $\beta$ . Serum NO, serum TNF- $\alpha$ ; and serum IL-1 $\beta$  were not analyzed at week 0. The outlier data are indicated by open squares.

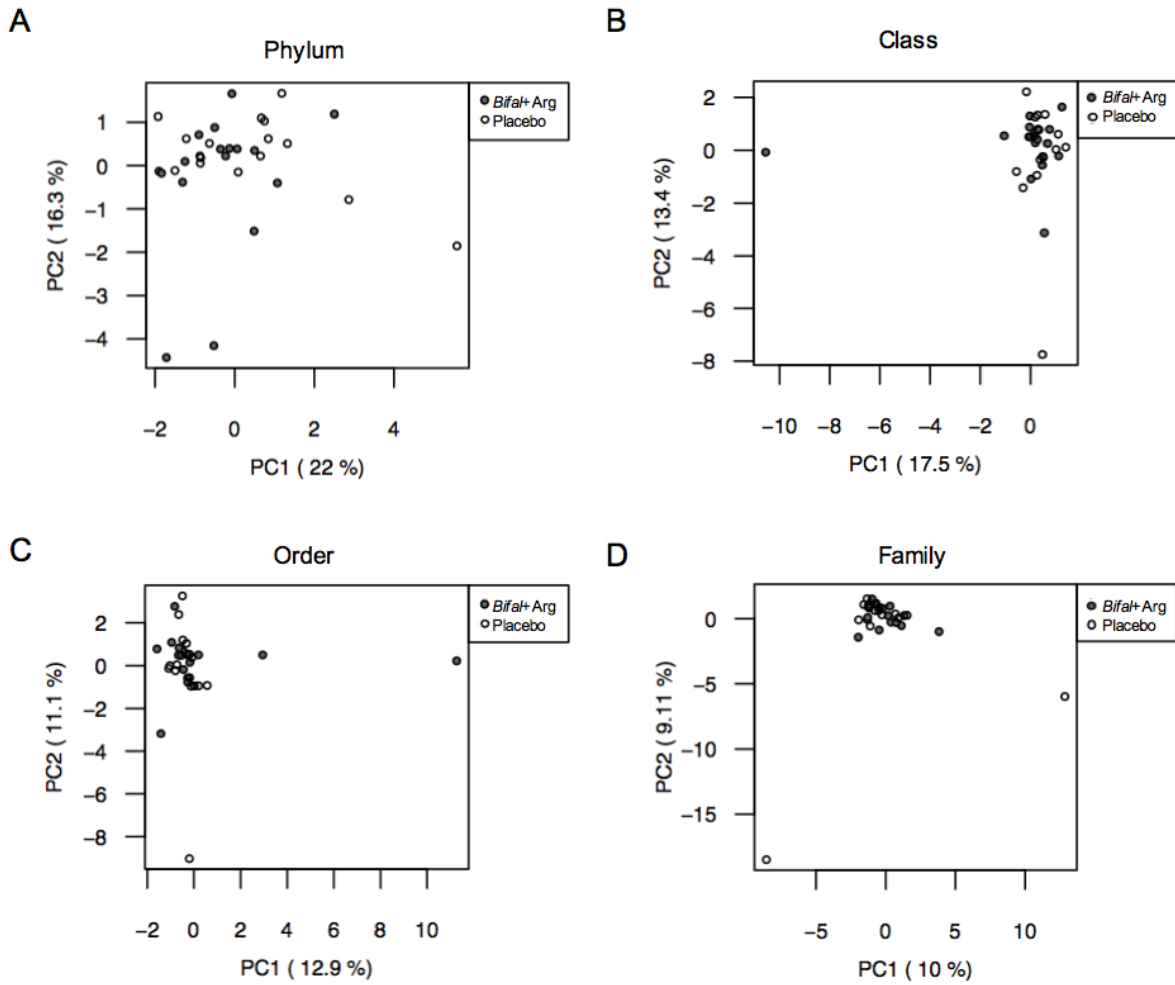

**Supplementary Figure S4.** Principal component analysis of fecal microbiota at the phylum level (A), class level (B), order level (C), and family level (D).

**Supplementary Table 1.** Characteristics of subjects' background and effects of yogurt containing *B. animalis* subsp. *lactis* and arginine on physical and blood parameters.

|                                            | <i>Bifal</i> +Arg<br>Mean (SEM) |                  |                   | Placebo          |               |                | Difference ( <i>p</i> -value) |         |        |                    |         |
|--------------------------------------------|---------------------------------|------------------|-------------------|------------------|---------------|----------------|-------------------------------|---------|--------|--------------------|---------|
|                                            | Week 0                          | Week 12          | Change            | Week 0           | Week 12       | Change         | <i>Bifal</i> +Arg vs. Placebo |         |        | Week 0 vs. Week 12 |         |
|                                            |                                 |                  |                   |                  |               |                | Week 0                        | Week 12 | Change | <i>Bifal</i> +Arg  | Placebo |
| <b>Physical examination</b>                |                                 |                  |                   |                  |               |                |                               |         |        |                    |         |
| Height, cm                                 | 163.7 (2.1)                     | 163.9 (2.0)      | +0.1 (0.1)        | 162.3 (2.2)      | 162.3 (2.2)   | +0.1 (0.2)     | 0.636                         | 0.308   | 0.486  | 0.288              | 0.718   |
| Body weight, kg                            | 64.0 (2.5)                      | 64.5 (2.5)       | +0.5 (0.3)        | 63.7 (2.6)       | 64.6 (2.6)    | +0.9 (0.6)     | 0.936                         | 0.496   | 0.450  | 0.083              | 0.142   |
| Abdominal circumference, cm                | 79.4 (2.3)                      | 82.8 (2.3)       | +3.4 (0.6)        | 80.2 (2.2)       | 84.3 (1.8)    | +4.1 (0.9)     | 0.798                         | 0.307   | 0.386  | 0.001*             | 0.001*  |
| Heart rate, bpm                            | 72.9 (1.7)                      | 70.9 (1.9)       | -2.0 (2.0)        | 69.7 (1.5)       | 73.2 (2.4)    | +3.5 (2.5)     | 0.158                         | 0.230   | 0.025* | 0.328              | 0.185   |
| BMI                                        | 23.8 (0.7)                      | 23.9 (0.7)       | +0.2 (0.1)        | 24.1 (0.6)       | 24.4 (0.7)    | +0.3 (0.2)     | 0.762                         | 0.323   | 0.405  | 0.198              | 0.142   |
| <b>Endothelial function/blood pressure</b> |                                 |                  |                   |                  |               |                |                               |         |        |                    |         |
| RHI                                        | 1.50 (0.07)                     | 1.81 (0.11)      | +0.31 (0.12)      | 1.68 (0.11)      | 1.63 (0.12)   | -0.07(0.18)    | 0.174                         | 0.132   | 0.017* | 0.010*             | 0.356   |
| Systolic blood pressure, mmHg              | 122.4 (2.3)                     | 120.2 (2.8)      | -2.2 (2.3)        | 123.1 (3.4)      | 125.3 (2.5)   | +2.13 (2.7)    | 0.855                         | 0.097   | 0.131  | 0.184              | 0.223   |
| Diastolic blood pressure, mmHg             | 77.9 (1.5)                      | 75.1 (2.2)       | -2.9 (2.1)        | 81.2 (2.2)       | 78.9 (1.9)    | -2.25 (1.5)    | 0.229                         | 0.097   | 0.405  | 0.093              | 0.073   |
| <b>Blood biochemical analyses</b>          |                                 |                  |                   |                  |               |                |                               |         |        |                    |         |
| White blood cell count , mL                | 6315 (316)                      | 5945 (326)       | -370 (307)        | 5641 (347)       | 5352 (240)    | -123 (395)     | 0.160                         | 0.086   | 0.303  | 0.245              | 0.759   |
| Erythrocyte count, 10 <sup>4</sup> /mL     | 482.7(11.7)                     | 478.6(10.9)      | -4.1 (5.1)        | 479.6(12.1)      | 470.5 (11.5)  | -9.1 (3.2)     | 0.853                         | 0.306   | 0.349  | 0.434              | 0.013*  |
| Hemoglobin, g/dL                           | 14.03(0.44)                     | 140.2 (0.4)      | -0.01 (0.24)      | 13.92 (0.4)      | 13.6 (0.38)   | -0.32 (0.12)   | 0.848                         | 0.226   | 0.255  | 0.964              | 0.022*  |
| Hematocrit, %                              | 43.5 (1.1)                      | 43.4 (1.1)       | -0.04 (0.5)       | 42.8 (0.9)       | 42.39 (0.98)  | -0.44 (0.34)   | 0.655                         | 0.238   | 0.364  | 0.932              | 0.221   |
| Platelet count, 10 <sup>4</sup> /mL        | 27.9 (1.4)                      | 25.6 (1.1)       | -2.2 (0.6)        | 27.7 (1.0)       | 28.4 (1.0)    | +0.7 (0.5)     | 0.938                         | 0.040*  | 0.017* | 0.003*             | 0.170   |
| Blood glucose level. mg/dL                 | 89.17(2.92)                     | 87.6 (2.2)       | -1.56 (2.24)      | 92.31 (3.5)      | 91.13 (3.54)  | +0.07(2.59)    | 0.492                         | 0.137   | 0.346  | 0.497              | 0.980   |
| Total cholesterol, mg/dL                   | 197.2 (6.6)                     | 196.3 (6.0)      | -0.9 (4.4)        | 223.8 (9.1)      | 223.1 (7.8)   | -0.7 (5.3)     | 0.022*                        | 0.006   | 0.491  | 0.829              | 0.898   |
| Triglyceride, mg/dL                        | 129.3(15.0)                     | 103.9(12.9)      | -25.4 (10.5)      | 104.8(15.7)      | 125.1 (22.3)  | 0.6 (8.0)      | 0.285                         | 0.202   | 0.085  | 0.027*             | 0.944   |
| HDL-cholesterol, mg/dL                     | 57.4 (3.3)                      | 60.4 (3.4)       | 3.0 (1.2)         | 54.4 (3.1)       | 55.6 (3.1)    | +1.21 (1.8)    | 0.536                         | 0.134   | 0.313  | 0.019*             | 0.502   |
| LDL-cholesterol, mg/dL                     | 121.7 (6.9)                     | 119.7 (6.3)      | -2.0 (3.5)        | 129.2(10.5)      | 131.1 (9.3)   | +1.9 (4.3)     | 0.547                         | 0.154   | 0.341  | 0.572              | 0.661   |
| NO <sub>2</sub> /NO <sub>3</sub> , mM      | N.T.                            | 21.3 (1.5)       | N.T.              | N.T.             | 24.5 (2.1)    | N.T            | -                             | 0.103   | -      | -                  | -       |
| <b>Inflammatory markers</b>                |                                 |                  |                   |                  |               |                |                               |         |        |                    |         |
| TNF- $\alpha$ , mM                         | N.T.                            | 0.552(0.03)      | N.T.              | N.T.             | 0.617 (0.05)  | N.T.           | -                             | 0.137   | -      | -                  | -       |
| IL-1, mM                                   | N.T.                            | 0.046(0.01)      | N.T.              | N.T.             | 0.039 (0.01)  | N.T.           | -                             | 0.294   | -      | -                  | -       |
| <b>Urinalysis</b>                          |                                 |                  |                   |                  |               |                |                               |         |        |                    |         |
| Specific gravity                           | 1.015<br>(0.002)                | 1.017<br>(0.002) | +0.002<br>(0.002) | 1.015<br>(0.002) | 1.017 (0.002) | +0.002 (0.002) | 0.888                         | 0.499   | 0.445  | 0.257              | 0.501   |
| pH                                         | 6.3 (0.1)                       | 6.1 (0.2)        | -0.1 (0.2)        | 6.2 (0.2)        | 6.0 (0.2)     | -0.2 (0.2)     | 0.769                         | 0.268   | 0.378  | 0.451              | 0.371   |

All data are represented as mean  $\pm$  SEM. Means are average of all obtained data; change values are calculated from data excluding outliers. Comparisons at week 0 and week 12 between the *Bifal*+Arg YG and placebo groups were tested by Student's *t*-test. Intra-group comparisons at week 0 and at week 12 were tested using the paired *t*-test. Comparisons of change value between the *Bifal*+Arg YG and placebo groups were tested by two-way ANOVA. All baseline  $\times$  change interactions are shown in Supplementary Table S2. N.T., not test.

**Supplementary Table S2.** Baseline × change interactions by two-way ANOVA in comparison of change values between the *Bifal*+Arg YG and placebo groups.

|                                                | baseline × change interaction | Difference (p-value) |
|------------------------------------------------|-------------------------------|----------------------|
| <b>Physical examination</b>                    |                               |                      |
| Height, cm                                     | 0.653                         | 0.486                |
| Body weight, kg                                | 0.866                         | 0.450                |
| Abdominal circumference, cm                    | 0.970                         | 0.386                |
| Heart rate, bpm                                | 0.028*                        | 0.025*               |
| BMI                                            | 0.900                         | 0.405                |
| <b>Endothelial function and blood pressure</b> |                               |                      |
| RHI                                            | 0.023                         | 0.017*               |
| Systolic blood pressure, mmHg                  | 0.509                         | 0.131                |
| Diastolic blood pressure, mmHg                 | 0.487                         | 0.405                |
| <b>Blood biochemical analyses</b>              |                               |                      |
| White blood cell count, mL                     | 0.111                         | 0.303                |
| Erythrocyte count, 10 <sup>4</sup> /mL         | 0.921                         | 0.349                |
| Hemoglobin, g/dL                               | 0.770                         | 0.255                |
| Hematocrit, %                                  | 0.868                         | 0.364                |
| Platelet count, 10 <sup>4</sup> /mL            | 0.111                         | 0.017*               |
| Blood glucose level, mg/dL                     | 0.790                         | 0.346                |
| Total cholesterol, mg/dL                       | 0.044                         | 0.491                |
| Triglyceride, mg/dL                            | 0.061                         | 0.085                |
| HDL-cholesterol, mg/dL                         | 0.820                         | 0.313                |
| LDL-cholesterol, mg/dL                         | 0.792                         | 0.341                |
| NO <sub>2</sub> /NO <sub>3</sub> , μM          |                               | -                    |
| <b>Urinalysis</b>                              |                               |                      |
| Specific gravity                               | 0.844                         | 0.445                |
| pH                                             | 0.962                         | 0.378                |

\*Significant difference

**Supplementary Table S3.** Effect of consumption of yogurt containing *B. animalis* subsp. *lactis* and Arg (*Bifal*+Arg YG) on fecal microbiota composition (phylum level)

| Phylum                      | <i>Bifal</i> +Arg |        |         |        | Placebo |        |         |        | Difference ( <i>p</i> -value) |         |                    |         |
|-----------------------------|-------------------|--------|---------|--------|---------|--------|---------|--------|-------------------------------|---------|--------------------|---------|
|                             | Week 0            |        | Week 12 |        | Week 0  |        | Week 12 |        | <i>Bifal</i> +Arg VS. Placebo |         | Week 0 VS. Week 12 |         |
|                             | Mean              | SEM    | Mean    | SEM    | Mean    | SEM    | Mean    | SEM    | Week 0                        | Week 12 | <i>Bifal</i> +Arg  | Placebo |
| Other phylum                | 0.4468            | 0.1197 | 0.5738  | 0.2846 | 0.8376  | 0.5371 | 0.7690  | 0.3498 | 0.73                          | 1.00    | 0.93               | 1.00    |
| Actinobacteria              | 5.7570            | 1.5603 | 10.7320 | 2.7014 | 6.7687  | 1.2355 | 10.1301 | 2.1919 | 0.96                          | 0.94    | 0.32               | 1.00    |
| Bacteroidetes               | 23.7262           | 4.7709 | 6.2236  | 1.6113 | 15.3235 | 3.6120 | 11.0537 | 3.3907 | 0.73                          | 0.81    | 0.02               | 1.00    |
| Candidatus Saccharibacteria | 0.0058            | 0.0016 | 0.0099  | 0.0026 | 0.0066  | 0.0020 | 0.0083  | 0.0035 | 0.73                          | 1.00    | 0.78               | 1.00    |
| Cyanobacteria/Chloroplast   | 0.0038            | 0.0019 | 0.0068  | 0.0037 | 0.0061  | 0.0034 | 0.0021  | 0.0012 | 0.73                          | 1.00    | 1.00               | 1.00    |
| Firmicutes                  | 66.4289           | 4.9578 | 79.8957 | 3.1530 | 75.6912 | 3.1742 | 76.8261 | 4.0392 | 0.73                          | 0.81    | 0.32               | 1.00    |
| Fusobacteria                | 1.1084            | 0.8079 | 0.0560  | 0.0414 | 0.5837  | 0.3067 | 0.7442  | 0.6998 | 0.98                          | 0.81    | 0.34               | 1.00    |
| Lentisphaerae               | 0.0012            | 0.0012 | 0.0000  | 0.0000 | 0.0003  | 0.0003 | 0.0000  | 0.0000 | -                             | 1.00    | 1.000              | 1.00    |
| Proteobacteria              | 2.4831            | 0.6833 | 2.4418  | 1.0007 | 0.7676  | 0.2449 | 0.3857  | 0.0764 | 0.73                          | 0.37    | 0.93               | 1.00    |
| Spirochaetes                | 0.0105            | 0.0105 | 0.0033  | 0.0033 | 0.0084  | 0.0080 | 0.0737  | 0.0645 | 0.73                          | 1.00    | 1.00               | 1.00    |
| Synergistetes               | 0.0004            | 0.0004 | 0.0050  | 0.0050 | 0.0002  | 0.0002 | 0.0007  | 0.0005 | 0.90                          | 1.00    | 1.00               | 1.00    |
| Verrucomicrobia             | 0.0280            | 0.0185 | 0.0521  | 0.0319 | 0.0062  | 0.0058 | 0.0065  | 0.0065 | 0.73                          | 0.94    | 1.00               | 1.00    |

Comparisons between the *Bifal*+Arg YG and placebo groups were tested using Mann-Whitney *U* tests. Comparisons at week 0 and at week 12 were tested using Wilcoxon signed rank tests. *p*-values were adjusted using the Benjamini and Hochberg method [1], and adjusted *p*-values less than 0.05 are indicated by red circles.

## References

1. Benjamini, Y.; Hochberg, Y. Controlling the false discovery rate: a practical and powerful approach to multiple testing. *J. R. Statist. Soc. B (Methodological)* **1995**, 289-300.



**Supplementary Table S4.** Effect of consumption of yogurt containing *B. animalis* subsp. *lactis* and Arg (*Bifal*+Arg YG) on fecal microbiota composition (class level)

| Class                                    | <i>Bifal</i> +Arg |        |         |        | Placebo |        |         |        | Difference ( <i>p</i> -value) |         |                    |         |
|------------------------------------------|-------------------|--------|---------|--------|---------|--------|---------|--------|-------------------------------|---------|--------------------|---------|
|                                          | Week 0            |        | Week 12 |        | Week 0  |        | Week 12 |        | <i>Bifal</i> +Arg VS. Placebo |         | Week 0 VS. Week 12 |         |
|                                          | Mean              | SEM    | Mean    | SEM    | Mean    | SEM    | Mean    | SEM    | Week 0                        | Week 12 | <i>Bifal</i> +Arg  | Placebo |
| Other phylum, Other class                | 0.4468            | 0.1197 | 0.5738  | 0.2846 | 0.8376  | 0.5371 | 0.7690  | 0.3498 | 1.00                          | 0.81    | 1.00               | 1.00    |
| Actinobacteria, Actinobacteria           | 5.7570            | 1.5603 | 10.7320 | 2.7014 | 6.7687  | 1.2355 | 10.1301 | 2.1919 | 1.00                          | 1.00    | 0.37               | 1.00    |
| Bacteroidetes, Other class               | 0.0398            | 0.0188 | 0.0246  | 0.0139 | 0.0065  | 0.0052 | 0.0002  | 0.0002 | 1.00                          | 0.64    | 1.00               | 0.79    |
| Bacteroidetes, Bacteroidia               | 23.6864           | 4.7714 | 6.1990  | 1.6068 | 15.3170 | 3.6128 | 11.0534 | 3.3907 | 1.00                          | 0.81    | 0.03               | 1.00    |
| Candidatus Saccharibacteria, Other class | 0.0058            | 0.0016 | 0.0099  | 0.0026 | 0.0066  | 0.0020 | 0.0083  | 0.0035 | 1.00                          | 0.81    | 0.89               | 1.00    |
| Cyanobacteria/Chloroplast, Chloroplast   | 0.0038            | 0.0019 | 0.0068  | 0.0037 | 0.0054  | 0.0034 | 0.0021  | 0.0012 | 1.00                          | 0.81    | 1.00               | 1.00    |
| Cyanobacteria/Chloroplast, Cyanobacteria | 0.0000            | 0.0000 | 0.0000  | 0.0000 | 0.0006  | 0.0006 | 0.0000  | 0.0000 | 1.00                          | -       | -                  | 1.00    |
| Firmicutes, Other class                  | 0.1680            | 0.0650 | 0.1194  | 0.0336 | 0.2677  | 0.1759 | 0.2781  | 0.1460 | 1.00                          | 1.00    | 1.00               | 1.00    |
| Firmicutes, Bacilli                      | 3.1051            | 0.9433 | 11.1388 | 3.3192 | 6.3936  | 3.8538 | 6.7904  | 1.7396 | 1.00                          | 0.81    | 0.044              | 0.79    |
| Firmicutes, Clostridia                   | 55.2614           | 5.5620 | 63.7566 | 3.9941 | 59.2689 | 4.8674 | 60.6042 | 4.2600 | 1.00                          | 0.86    | 0.89               | 1.00    |
| Firmicutes, Erysipelotrichia             | 4.4262            | 1.3508 | 3.9570  | 0.7132 | 4.2730  | 1.1484 | 6.4483  | 1.5434 | 1.00                          | 0.81    | 1.00               | 1.00    |
| Firmicutes, Negativicutes                | 3.4682            | 1.9776 | 0.9240  | 0.4764 | 5.4880  | 2.2003 | 2.7051  | 0.9876 | 1.00                          | 0.81    | 0.04               | 1.00    |
| Fusobacteria, Fusobacteriia              | 1.1084            | 0.8079 | 0.0560  | 0.0414 | 0.5837  | 0.3067 | 0.7442  | 0.6998 | 1.00                          | 1.00    | 0.48               | 1.00    |
| Lentisphaerae, Lentisphaeria             | 0.0012            | 0.0012 | 0.0000  | 0.0000 | 0.0003  | 0.0003 | 0.0000  | 0.0000 | 1.00                          | -       | 1.00               | 1.00    |
| Proteobacteria, Other class              | 0.0010            | 0.0010 | 0.0013  | 0.0013 | 0.0004  | 0.0004 | 0.0000  | 0.0000 | 1.00                          | 1.00    | 1.00               | 1.00    |
| Proteobacteria, Alphaproteobacteria      | 0.0006            | 0.0004 | 0.0043  | 0.0040 | 0.0000  | 0.0000 | 0.0007  | 0.0005 | 1.00                          | 1.00    | 1.00               | 1.00    |
| Proteobacteria, Betaproteobacteria       | 0.4481            | 0.2022 | 0.2814  | 0.1308 | 0.2436  | 0.1498 | 0.1060  | 0.0500 | 1.00                          | 0.81    | 1.00               | 1.00    |
| Proteobacteria, Deltaproteobacteria      | 0.0331            | 0.0129 | 0.0126  | 0.0081 | 0.0640  | 0.0322 | 0.0229  | 0.0134 | 1.00                          | 1.00    | 0.48               | 1.00    |
| Proteobacteria, Epsilonproteobacteria    | 0.0098            | 0.0098 | 0.0000  | 0.0000 | 0.0003  | 0.0003 | 0.0000  | 0.0000 | 1.00                          | -       | 1.00               | 1.00    |
| Proteobacteria, Gammaproteobacteria      | 1.9904            | 0.6231 | 2.1421  | 1.0038 | 0.4593  | 0.1508 | 0.2561  | 0.0779 | 1.00                          | 0.81    | 1.00               | 1.00    |
| Spirochaetes, Spirochaetia               | 0.0105            | 0.0105 | 0.0033  | 0.0033 | 0.0084  | 0.0080 | 0.0737  | 0.0645 | 1.00                          | 0.81    | 1.00               | 1.00    |
| Synergistetes, Synergistia               | 0.0004            | 0.0004 | 0.0050  | 0.0050 | 0.0002  | 0.0002 | 0.0007  | 0.0005 | 1.00                          | 1.00    | 1.00               | 1.00    |
| Verrucomicrobia, Verrucomicrobiae        | 0.0280            | 0.0185 | 0.0521  | 0.0319 | 0.0062  | 0.0058 | 0.0065  | 0.0065 | 1.00                          | 0.81    | 1.00               | 1.00    |

Comparisons between the *Bifal*+Arg YG and placebo groups were tested using Mann-Whitney *U* tests. Comparisons at week 0 and at week 12 were tested using Wilcoxon signed rank tests. *p*-values were adjusted using the Benjamini and Hochberg method [1], and adjusted *p*-values less than 0.05 are indicated by red circles.

## References

1. Benjamini, Y.; Hochberg, Y. Controlling the false discovery rate: a practical and powerful approach to multiple testing. *J. R. Statist. Soc. B (Methodological)* **1995**, 289-300.

**Supplementary Table S5.** Effect of consumption of yogurt containing *B. animalis* subsp. *lactis* and Arg (*Bifal*+Arg YG) on fecal microbiota composition (order level)

| Order                                                     | <i>Bifal</i> +Arg |        |         |        | Placebo |        |         |        | Difference ( <i>p</i> -value) |         |                    |         |
|-----------------------------------------------------------|-------------------|--------|---------|--------|---------|--------|---------|--------|-------------------------------|---------|--------------------|---------|
|                                                           | Week 0            |        | Week 12 |        | Week 0  |        | Week 12 |        | <i>Bifal</i> +Arg VS. Placebo |         | Week 0 VS. Week 12 |         |
|                                                           | Mean              | SEM    | Mean    | SEM    | Mean    | SEM    | Mean    | SEM    | Week 0                        | Week 12 | <i>Bifal</i> +Arg  | Placebo |
| Other phylum, Other class, Other order                    | 0.4468            | 0.1197 | 0.5738  | 0.2846 | 0.8376  | 0.5371 | 0.7690  | 0.3498 | 1.00                          | 1.00    | 1.00               | 1.00    |
| Actinobacteria, Actinobacteria, Other order               | 0.0000            | 0.0000 | 0.0000  | 0.0000 | 0.0000  | 0.0000 | 0.0003  | 0.0003 | -                             | 0.89    | -                  | 1.00    |
| Actinobacteria, Actinobacteria, Acidimicrobiales          | 0.0006            | 0.0006 | 0.0000  | 0.0000 | 0.0000  | 0.0000 | 0.0000  | 0.0000 | 1.00                          | -       | 1.00               | -       |
| Actinobacteria, Actinobacteria, Actinomycetales           | 0.0205            | 0.0037 | 0.0175  | 0.0043 | 0.0392  | 0.0217 | 0.0146  | 0.0043 | 1.00                          | 0.98    | 1.00               | 1.00    |
| Actinobacteria, Actinobacteria, Bifidobacteriales         | 5.4790            | 1.5724 | 10.2765 | 2.6920 | 6.3311  | 1.2241 | 9.6698  | 2.1906 | 1.00                          | 1.00    | 0.55               | 1.00    |
| Actinobacteria, Actinobacteria, Coriobacteriales          | 0.2569            | 0.0629 | 0.4381  | 0.0649 | 0.3985  | 0.1183 | 0.4455  | 0.1057 | 1.00                          | 0.92    | 0.15               | 1.00    |
| Bacteroidetes, Other class, Other order                   | 0.0398            | 0.0188 | 0.0246  | 0.0139 | 0.0065  | 0.0052 | 0.0002  | 0.0002 | 1.00                          | 0.89    | 1.00               | 1.00    |
| Bacteroidetes, Bacteroidia, Bacteroidales                 | 23.6864           | 4.7714 | 6.1990  | 1.6088 | 15.3170 | 3.6128 | 11.0534 | 3.3907 | 1.00                          | 0.89    | 0.05               | 1.00    |
| Candidatus Saccharibacteria, Other class, Other order     | 0.0058            | 0.0016 | 0.0099  | 0.0026 | 0.0066  | 0.0020 | 0.0083  | 0.0035 | 1.00                          | 0.89    | 1.00               | 1.00    |
| Cyanobacteria/Chloroplast, Chloroplast, Other order       | 0.0038            | 0.0019 | 0.0068  | 0.0037 | 0.0054  | 0.0034 | 0.0021  | 0.0012 | 1.00                          | 0.89    | 1.00               | 1.00    |
| Cyanobacteria/Chloroplast, Cyanobacteria, Other order     | 0.0000            | 0.0000 | 0.0000  | 0.0000 | 0.0006  | 0.0006 | 0.0000  | 0.0000 | -                             | 1.00    | -                  | 1.00    |
| Firmicutes, Other class, Other order                      | 0.1680            | 0.0650 | 0.1194  | 0.0336 | 0.2677  | 0.1759 | 0.2781  | 0.1460 | 1.00                          | 1.00    | 1.00               | 1.00    |
| Firmicutes, Bacilli, Other order                          | 0.0000            | 0.0000 | 0.0006  | 0.0006 | 0.0000  | 0.0000 | 0.0004  | 0.0004 | 1.00                          | 0.92    | 1.00               | 1.00    |
| Firmicutes, Bacilli, Bacillales                           | 0.0340            | 0.0080 | 0.0742  | 0.0420 | 0.1681  | 0.1404 | 0.0455  | 0.0162 | 1.00                          | 0.89    | 1.00               | 1.00    |
| Firmicutes, Clostridia, Other order                       | 0.0083            | 0.0065 | 0.0028  | 0.0028 | 0.0188  | 0.0166 | 0.0186  | 0.0177 | 1.00                          | 0.89    | 1.00               | 1.00    |
| Firmicutes, Clostridia, Clostridiales                     | 55.2531           | 5.5594 | 63.7538 | 3.9934 | 59.2501 | 4.8702 | 60.5856 | 4.2633 | 1.00                          | 0.89    | 1.00               | 1.00    |
| Firmicutes, Erysipelotrichia, Erysipelotrichales          | 4.4262            | 1.3508 | 3.9570  | 0.7132 | 4.2730  | 1.1484 | 6.4483  | 1.5434 | 1.00                          | 0.89    | 1.00               | 1.00    |
| Firmicutes, Negativicutes, Selenomonadales                | 3.4682            | 1.9776 | 0.9240  | 0.4764 | 5.4880  | 2.2003 | 2.7051  | 0.9876 | 1.00                          | 1.00    | 0.07               | 1.00    |
| Fusobacteria, Fusobacteriia, Fusobacteriales              | 1.1084            | 0.8079 | 0.0560  | 0.0414 | 0.5837  | 0.3067 | 0.7442  | 0.6998 | 1.00                          | 0.89    | 0.55               | 1.00    |
| Lentisphaerae, Lentisphaeria, Vitrivallales               | 0.0012            | 0.0012 | 0.0000  | 0.0000 | 0.0003  | 0.0003 | 0.0000  | 0.0000 | 1.00                          | 0.89    | 1.00               | 1.00    |
| Proteobacteria, Other class, Other order                  | 0.0010            | 0.0010 | 0.0013  | 0.0013 | 0.0004  | 0.0004 | 0.0000  | 0.0000 | 1.00                          | 0.89    | 1.00               | 1.00    |
| Proteobacteria, Alphaproteobacteria, Caulobacteriales     | 0.0003            | 0.0003 | 0.0000  | 0.0000 | 0.0000  | 0.0000 | 0.0004  | 0.0004 | 1.00                          | 0.89    | 1.00               | 1.00    |
| Proteobacteria, Alphaproteobacteria, Other order          | 0.0003            | 0.0003 | 0.0040  | 0.0040 | 0.0000  | 0.0000 | 0.0000  | 0.0000 | 1.00                          | -       | 1.00               | -       |
| Proteobacteria, Alphaproteobacteria, Rhizobiales          | 0.0000            | 0.0000 | 0.0000  | 0.0000 | 0.0000  | 0.0000 | 0.0003  | 0.0003 | -                             | 1.00    | -                  | 1.00    |
| Proteobacteria, Alphaproteobacteria, Sphingomonadales     | 0.0000            | 0.0000 | 0.0003  | 0.0003 | 0.0000  | 0.0000 | 0.0000  | 0.0000 | 1.00                          | -       | 1.00               | -       |
| Proteobacteria, Betaproteobacteria, Other order           | 0.0119            | 0.0090 | 0.0003  | 0.0003 | 0.0386  | 0.0373 | 0.0029  | 0.0022 | 1.00                          | 0.89    | 0.55               | 1.00    |
| Proteobacteria, Betaproteobacteria, Burkholderiales       | 0.4363            | 0.1995 | 0.2812  | 0.1306 | 0.2049  | 0.1483 | 0.1031  | 0.0503 | 1.00                          | 0.89    | 1.00               | 1.00    |
| Proteobacteria, Deltaproteobacteria, Desulfovibrionales   | 0.0331            | 0.0129 | 0.0126  | 0.0081 | 0.0640  | 0.0322 | 0.0229  | 0.0134 | 1.00                          | 1.00    | 0.56               | 1.00    |
| Proteobacteria, Epsilonproteobacteria, Campylobacteriales | 0.0098            | 0.0098 | 0.0000  | 0.0000 | 0.0003  | 0.0003 | 0.0000  | 0.0000 | 1.00                          | 0.89    | 1.00               | 1.00    |
| Proteobacteria, Gammaproteobacteria, Enterobacteriales    | 1.9746            | 0.6232 | 2.1152  | 0.9995 | 0.3964  | 0.1513 | 0.2160  | 0.0773 | 0.73                          | 1.00    | 1.00               | 1.00    |
| Proteobacteria, Gammaproteobacteria, Other order          | 0.0000            | 0.0000 | 0.0003  | 0.0003 | 0.0000  | 0.0000 | 0.0000  | 0.0000 | 1.00                          | -       | 1.00               | -       |
| Proteobacteria, Gammaproteobacteria, Pasteurellales       | 0.0156            | 0.0062 | 0.0267  | 0.0119 | 0.0627  | 0.0289 | 0.0399  | 0.0250 | 1.00                          | 1.00    | 1.00               | 1.00    |
| Proteobacteria, Gammaproteobacteria, Pseudomonadales      | 0.0002            | 0.0002 | 0.0000  | 0.0000 | 0.0002  | 0.0002 | 0.0000  | 0.0000 | 1.00                          | 0.89    | 1.00               | 1.00    |
| Proteobacteria, Gammaproteobacteria, Xanthomonadales      | 0.0000            | 0.0000 | 0.0000  | 0.0000 | 0.0000  | 0.0000 | 0.0003  | 0.0003 | -                             | 1.00    | -                  | 1.00    |
| Spirochaetes, Spirochaetia, Spirochaetales                | 0.0105            | 0.0105 | 0.0033  | 0.0033 | 0.0084  | 0.0080 | 0.0737  | 0.0645 | 1.00                          | 1.00    | 1.00               | 1.00    |
| Synergistetes, Synergistia, Synergistales                 | 0.0004            | 0.0004 | 0.0050  | 0.0050 | 0.0002  | 0.0002 | 0.0007  | 0.0005 | 1.00                          | 0.89    | 1.00               | 1.00    |
| Verrucomicrobia, Verrucomicrobiae, Verrucomicrobiales     | 0.0280            | 0.0185 | 0.0521  | 0.0319 | 0.0062  | 0.0058 | 0.0065  | 0.0065 | 1.00                          | 1.00    | 1.00               | 1.00    |

Comparisons between the *Bifal*+Arg YG and placebo groups were tested using Mann-Whitney *U* tests. Comparisons at week 0 and at week 12 were tested using Wilcoxon signed rank tests. *p*-values were adjusted using the Benjamini and Hochberg method [1].

## References

1. Benjamini, Y.; Hochberg, Y. Controlling the false discovery rate: a practical and powerful approach to multiple testing. *J. R. Statist. Soc. B (Methodological)* **1995**, 289-300.

**Supplementary Table S6.** Effect of consumption of yogurt containing *B. animalis* subsp. *lactis* and Arg (*Bifal*+Arg YG) on fecal microbiota composition (family level)

| Family                                                                   | <i>Bifal</i> +Arg |        |         |        | Placebo |        |         |        | Difference (p-value)          |         |                    |         |
|--------------------------------------------------------------------------|-------------------|--------|---------|--------|---------|--------|---------|--------|-------------------------------|---------|--------------------|---------|
|                                                                          | Week 0            |        | Week 12 |        | Week 0  |        | Week 12 |        | <i>Bifal</i> +Arg VS. Placebo |         | Week 0 VS. Week 12 |         |
|                                                                          | Mean              | SEM    | Mean    | SEM    | Mean    | SEM    | Mean    | SEM    | Week 0                        | Week 12 | <i>Bifal</i> +Arg  | Placebo |
| Other phylum, Other class, Other order, Other family                     | 0.4468            | 0.1197 | 0.5738  | 0.2846 | 0.8376  | 0.5371 | 0.7690  | 0.3498 | 1.00                          | 0.87    | 1.00               | 1.00    |
| Actinobacteria, Actinobacteria, Other order, Other family                | 0.0000            | 0.0000 | 0.0000  | 0.0000 | 0.0000  | 0.0000 | 0.0003  | 0.0003 | -                             | 0.87    | -                  | 1.00    |
| Actinobacteria, Actinobacteria, Acidimicrobiales, Other family           | 0.0006            | 0.0006 | 0.0000  | 0.0000 | 0.0000  | 0.0000 | 0.0000  | 0.0000 | 1.00                          | -       | 1.00               | 1.00    |
| Actinobacteria, Actinobacteria, Actinomycetales, Actinomycetaceae        | 0.0141            | 0.0020 | 0.0115  | 0.0031 | 0.0274  | 0.0146 | 0.0076  | 0.0030 | 1.00                          | 0.87    | 1.00               | 1.00    |
| Actinobacteria, Actinobacteria, Actinomycetales, Other family            | 0.0014            | 0.0008 | 0.0003  | 0.0003 | 0.0014  | 0.0006 | 0.0013  | 0.0006 | 1.00                          | 0.87    | 1.00               | 1.00    |
| Actinobacteria, Actinobacteria, Actinomycetales, Corynebacteriaceae      | 0.0018            | 0.0012 | 0.0017  | 0.0010 | 0.0003  | 0.0003 | 0.0000  | 0.0000 | 1.00                          | 0.87    | 1.00               | 1.00    |
| Actinobacteria, Actinobacteria, Actinomycetales, Dermabacteraceae        | 0.0000            | 0.0000 | 0.0004  | 0.0004 | 0.0000  | 0.0000 | 0.0000  | 0.0000 | -                             | 1.00    | 1.00               | -       |
| Actinobacteria, Actinobacteria, Actinomycetales, Micrococcaceae          | 0.0033            | 0.0012 | 0.0030  | 0.0015 | 0.0099  | 0.0074 | 0.0056  | 0.0022 | 1.00                          | 0.87    | 1.00               | 1.00    |
| Actinobacteria, Actinobacteria, Actinomycetales, Propionibacteriaceae    | 0.0000            | 0.0000 | 0.0007  | 0.0004 | 0.0002  | 0.0002 | 0.0000  | 0.0000 | 1.00                          | 0.87    | 1.00               | 1.00    |
| Actinobacteria, Actinobacteria, Bifidobacteriales, Bifidobacteriaceae    | 5.4790            | 1.5724 | 10.2765 | 2.6920 | 6.3311  | 1.2241 | 9.6698  | 2.1906 | 1.00                          | 1.00    | 0.74               | 1.00    |
| Actinobacteria, Actinobacteria, Coriobacteriales, Coriobacteriaceae      | 0.2569            | 0.0629 | 0.4381  | 0.0649 | 0.3985  | 0.1183 | 0.4455  | 0.1057 | 1.00                          | 0.91    | 0.40               | 1.00    |
| Bacteroidetes, Other class, Other order, Other family                    | 0.0398            | 0.0188 | 0.0246  | 0.0139 | 0.0065  | 0.0052 | 0.0002  | 0.0002 | 1.00                          | 0.87    | 1.00               | 1.00    |
| Bacteroidetes, Bacteroidia, Bacteroidales, Other family                  | 0.4347            | 0.2253 | 0.2761  | 0.2203 | 0.0095  | 0.0072 | 0.0137  | 0.0137 | 1.00                          | 0.87    | 1.00               | 1.00    |
| Bacteroidetes, Bacteroidia, Bacteroidales, Bacteroidaceae                | 16.9896           | 4.4885 | 3.7743  | 0.8389 | 11.7978 | 3.5630 | 8.9581  | 3.1323 | 1.00                          | 0.87    | 0.12               | 1.00    |
| Bacteroidetes, Bacteroidia, Bacteroidales, Porphyromonadaceae            | 2.6905            | 0.8371 | 0.7105  | 0.2591 | 1.2856  | 0.2969 | 1.3994  | 0.4674 | 1.00                          | 0.87    | 0.74               | 1.00    |
| Bacteroidetes, Bacteroidia, Bacteroidales, Prevotellaceae                | 2.9752            | 1.5143 | 1.1329  | 0.7845 | 1.7609  | 0.8926 | 0.3886  | 0.1533 | 1.00                          | 0.92    | 1.00               | 1.00    |
| Bacteroidetes, Bacteroidia, Bacteroidales, Rikenellaceae                 | 0.5964            | 0.1730 | 0.3051  | 0.1546 | 0.4632  | 0.2329 | 0.2936  | 0.0979 | 1.00                          | 0.87    | 0.74               | 1.00    |
| Candidatus Saccharibacteria, Other class, Other order, Other family      | 0.0058            | 0.0016 | 0.0099  | 0.0026 | 0.0066  | 0.0020 | 0.0083  | 0.0035 | 1.00                          | 0.87    | 1.00               | 1.00    |
| Cyanobacteria/Chloroplast, Chloroplast, Other order, Other family        | 0.0038            | 0.0019 | 0.0068  | 0.0037 | 0.0054  | 0.0034 | 0.0021  | 0.0012 | 1.00                          | 0.87    | 1.00               | 1.00    |
| Cyanobacteria/Chloroplast, Cyanobacteria, Other order, Other family      | 0.0000            | 0.0000 | 0.0000  | 0.0000 | 0.0006  | 0.0006 | 0.0000  | 0.0000 | 1.00                          | -       | -                  | 1.00    |
| Firmicutes, Other class, Other order, Other family                       | 0.1680            | 0.0650 | 0.1194  | 0.0336 | 0.2677  | 0.1759 | 0.2781  | 0.1460 | 1.00                          | 1.00    | 1.00               | 1.00    |
| Firmicutes, Bacilli, Other order, Other family                           | 0.0000            | 0.0000 | 0.0006  | 0.0006 | 0.0000  | 0.0000 | 0.0004  | 0.0004 | -                             | 1.00    | 1.00               | 1.00    |
| Firmicutes, Bacilli, Bacillales, Bacillaceae 1                           | 0.0115            | 0.0056 | 0.0087  | 0.0061 | 0.0000  | 0.0000 | 0.0136  | 0.0098 | 0.74                          | 0.87    | 1.00               | 1.00    |
| Firmicutes, Bacilli, Bacillales, Bacillales_Incertae Sedis XI            | 0.0202            | 0.0067 | 0.0639  | 0.0422 | 0.0549  | 0.0294 | 0.0311  | 0.0086 | 1.00                          | 0.87    | 1.00               | 1.00    |
| Firmicutes, Bacilli, Bacillales, Listeriaceae                            | 0.0000            | 0.0000 | 0.0000  | 0.0000 | 0.1083  | 0.1083 | 0.0000  | 0.0000 | 1.00                          | -       | -                  | 1.00    |
| Firmicutes, Bacilli, Bacillales, Paenibacillaceae 1                      | 0.0000            | 0.0000 | 0.0000  | 0.0000 | 0.0005  | 0.0005 | 0.0000  | 0.0000 | 1.00                          | -       | -                  | 1.00    |
| Firmicutes, Bacilli, Bacillales, Staphylococcaceae                       | 0.0022            | 0.0015 | 0.0015  | 0.0010 | 0.0043  | 0.0037 | 0.0008  | 0.0006 | 1.00                          | 1.00    | 1.00               | 1.00    |
| Firmicutes, Bacilli, Lactobacillales, Other family                       | 0.0007            | 0.0005 | 0.0006  | 0.0004 | 0.0003  | 0.0003 | 0.0011  | 0.0008 | 1.00                          | 1.00    | 1.00               | 1.00    |
| Firmicutes, Bacilli, Lactobacillales, Aerococcaceae                      | 0.0021            | 0.0013 | 0.0097  | 0.0052 | 0.0004  | 0.0004 | 0.0003  | 0.0003 | 1.00                          | 0.87    | 1.00               | 1.00    |
| Firmicutes, Bacilli, Lactobacillales, Carnobacteriaceae                  | 0.0176            | 0.0053 | 0.0133  | 0.0054 | 0.2348  | 0.2154 | 0.0169  | 0.0072 | 1.00                          | 1.00    | 1.00               | 1.00    |
| Firmicutes, Bacilli, Lactobacillales, Enterococcaceae                    | 0.3186            | 0.1868 | 0.4910  | 0.2445 | 0.0234  | 0.0113 | 0.0310  | 0.0211 | 1.00                          | 0.87    | 1.00               | 1.00    |
| Firmicutes, Bacilli, Lactobacillales, Lactobacillaceae                   | 0.5160            | 0.2438 | 1.4652  | 0.7793 | 0.2481  | 0.1928 | 0.1445  | 0.0982 | 1.00                          | 0.95    | 1.00               | 1.00    |
| Firmicutes, Bacilli, Lactobacillales, Leuconostocaceae                   | 0.0007            | 0.0004 | 0.0009  | 0.0006 | 0.0179  | 0.0148 | 0.0020  | 0.0010 | 1.00                          | 0.87    | 1.00               | 1.00    |
| Firmicutes, Bacilli, Lactobacillales, Streptococcaceae                   | 2.2153            | 0.8105 | 9.0832  | 2.7580 | 5.7006  | 3.8051 | 6.5487  | 1.7114 | 1.00                          | 0.91    | 0.07               | 1.00    |
| Firmicutes, Clostridia, Other order, Other family                        | 0.0083            | 0.0065 | 0.0028  | 0.0028 | 0.0188  | 0.0166 | 0.0186  | 0.0177 | 1.00                          | 0.87    | 1.00               | 1.00    |
| Firmicutes, Clostridia, Clostridiales, Other family                      | 1.2237            | 0.4949 | 0.7063  | 0.2012 | 0.5991  | 0.2854 | 0.6487  | 0.3270 | 1.00                          | 0.87    | 1.00               | 1.00    |
| Firmicutes, Clostridia, Clostridiales, Catabacteriaceae                  | 0.0025            | 0.0014 | 0.0086  | 0.0048 | 0.0024  | 0.0013 | 0.0008  | 0.0006 | 1.00                          | 0.87    | 1.00               | 1.00    |
| Firmicutes, Clostridia, Clostridiales, Christensenellaceae               | 0.0007            | 0.0007 | 0.0037  | 0.0037 | 0.0054  | 0.0034 | 0.0064  | 0.0040 | 1.00                          | 0.87    | 1.00               | 1.00    |
| Firmicutes, Clostridia, Clostridiales, Clostridiaceae 1                  | 0.1988            | 0.0932 | 0.8478  | 0.7834 | 0.0421  | 0.0174 | 0.0706  | 0.0264 | 1.00                          | 1.00    | 1.00               | 1.00    |
| Firmicutes, Clostridia, Clostridiales, Clostridiales_Incertae Sedis XI   | 0.0062            | 0.0025 | 0.0487  | 0.0279 | 0.0055  | 0.0016 | 0.0046  | 0.0021 | 1.00                          | 0.87    | 1.00               | 1.00    |
| Firmicutes, Clostridia, Clostridiales, Clostridiales_Incertae Sedis XIII | 0.2223            | 0.0925 | 0.3757  | 0.1130 | 0.3636  | 0.1129 | 0.3925  | 0.1579 | 1.00                          | 1.00    | 1.00               | 1.00    |
| Firmicutes, Clostridia, Clostridiales, Eubacteriaceae                    | 0.0912            | 0.0664 | 0.1790  | 0.1082 | 0.0928  | 0.0396 | 0.0873  | 0.0299 | 1.00                          | 1.00    | 1.00               | 1.00    |
| Firmicutes, Clostridia, Clostridiales, Lachnospiraceae                   | 38.9476           | 4.2941 | 45.9422 | 3.0268 | 41.9738 | 3.5312 | 44.4537 | 4.4503 | 1.00                          | 1.00    | 0.75               | 1.00    |
| Firmicutes, Clostridia, Clostridiales, Peptoniphilaceae                  | 0.0037            | 0.0018 | 0.0048  | 0.0025 | 0.0019  | 0.0010 | 0.0010  | 0.0007 | 1.00                          | 0.87    | 1.00               | 1.00    |
| Firmicutes, Clostridia, Clostridiales, Peptostreptococcaceae             | 2.3278            | 0.9468 | 1.8649  | 0.6481 | 1.3918  | 0.3981 | 3.1623  | 1.4492 | 1.00                          | 0.87    | 1.00               | 1.00    |
| Firmicutes, Clostridia, Clostridiales, Ruminococcaceae                   | 12.2286           | 2.2596 | 13.7721 | 2.6008 | 14.7720 | 2.7706 | 11.7578 | 2.4726 | 1.00                          | 1.00    | 1.00               | 1.00    |
| Firmicutes, Erysipelotrichia, Erysipelotrichales, Erysipelotrichaceae    | 4.4262            | 1.3508 | 3.9570  | 0.7132 | 4.2730  | 1.1484 | 6.4483  | 1.5434 | 1.00                          | 0.87    | 1.00               | 1.00    |
| Firmicutes, Negativicutes, Selenomonadales, Acidaminococcaceae           | 0.2982            | 0.1100 | 0.0605  | 0.0303 | 0.3048  | 0.0908 | 0.2365  | 0.1398 | 1.00                          | 0.87    | 0.95               | 1.00    |
| Firmicutes, Negativicutes, Selenomonadales, Veillonellaceae              | 3.1700            | 1.9099 | 0.8635  | 0.4771 | 5.1832  | 2.1909 | 2.4687  | 0.9032 | 1.00                          | 0.87    | 0.74               | 1.00    |
| Fusobacteria, Fusobacteriia, Fusobacteriales, Fusobacteriaceae           | 1.1078            | 0.8079 | 0.0560  | 0.0414 | 0.5837  | 0.3067 | 0.7442  | 0.6998 | 1.00                          | 1.00    | 0.79               | 1.00    |
| Fusobacteria, Fusobacteriia, Fusobacteriales, Leptotrichiaceae           | 0.0006            | 0.0006 | 0.0000  | 0.0000 | 0.0000  | 0.0000 | 0.0000  | 0.0000 | 1.00                          | -       | 1.00               | -       |



## Supplementary Table S6. Continued

| Family                                                                       | <i>Bifal</i> +Arg |        |         |        | Placebo |        |         |        | Difference ( <i>p</i> -value) |         |                    |         |
|------------------------------------------------------------------------------|-------------------|--------|---------|--------|---------|--------|---------|--------|-------------------------------|---------|--------------------|---------|
|                                                                              | Week 0            |        | Week 12 |        | Week 0  |        | Week 12 |        | <i>Bifal</i> +Arg VS. Placebo |         | Week 0 VS. Week 12 |         |
|                                                                              | Mean              | SEM    | Mean    | SEM    | Mean    | SEM    | Mean    | SEM    | Week 0                        | Week 12 | <i>Bifal</i> +Arg  | Placebo |
| Lentisphaerae, Lentisphaeria, Victivallales, Victivallaceae                  | 0.0012            | 0.0012 | 0.0000  | 0.0000 | 0.0003  | 0.0003 | 0.0000  | 0.0000 | 1.00                          | -       | 1.00               | 1.00    |
| Proteobacteria, Other class, Other order, Other family                       | 0.0010            | 0.0010 | 0.0013  | 0.0013 | 0.0004  | 0.0004 | 0.0000  | 0.0000 | -                             | 1.00    | 1.00               | 1.00    |
| Proteobacteria, Alphaproteobacteria, Other order, Other family               | 0.0003            | 0.0003 | 0.0040  | 0.0040 | 0.0000  | 0.0000 | 0.0000  | 0.0000 | 1.00                          | 1.00    | 1.00               | -       |
| Proteobacteria, Alphaproteobacteria, Caulobacterales, Caulobacteraceae       | 0.0003            | 0.0003 | 0.0000  | 0.0000 | 0.0000  | 0.0000 | 0.0004  | 0.0004 | 1.00                          | 0.87    | 1.00               | 1.00    |
| Proteobacteria, Alphaproteobacteria, Rhizobiales, Methylobacteriaceae        | 0.0000            | 0.0000 | 0.0000  | 0.0000 | 0.0000  | 0.0000 | 0.0003  | 0.0003 | -                             | 0.87    | -                  | 1.00    |
| Proteobacteria, Alphaproteobacteria, Sphingomonadales, Sphingomonadaceae     | 0.0000            | 0.0000 | 0.0003  | 0.0003 | 0.0000  | 0.0000 | 0.0000  | 0.0000 | -                             | 1.00    | 1.00               | -       |
| Proteobacteria, Betaproteobacteria, Other order, Other family                | 0.0119            | 0.0090 | 0.0003  | 0.0003 | 0.0386  | 0.0373 | 0.0029  | 0.0022 | 1.00                          | 0.87    | 0.75               | 1.00    |
| Proteobacteria, Betaproteobacteria, Burkholderiales, Comamonadaceae          | 0.0000            | 0.0000 | 0.0003  | 0.0003 | 0.0000  | 0.0000 | 0.0000  | 0.0000 | -                             | 1.00    | 1.00               | -       |
| Proteobacteria, Betaproteobacteria, Burkholderiales, Oxalobacteraceae        | 0.0003            | 0.0003 | 0.0007  | 0.0007 | 0.0036  | 0.0036 | 0.0137  | 0.0137 | 1.00                          | 1.00    | 1.00               | 1.00    |
| Proteobacteria, Betaproteobacteria, Burkholderiales, Sutterellaceae          | 0.4359            | 0.1995 | 0.2802  | 0.1304 | 0.2013  | 0.1476 | 0.0894  | 0.0475 | 1.00                          | 0.87    | 1.00               | 1.00    |
| Proteobacteria, Deltaproteobacteria, Desulfovibrionales, Other family        | 0.0003            | 0.0003 | 0.0008  | 0.0008 | 0.0011  | 0.0011 | 0.0007  | 0.0007 | 1.00                          | 1.00    | 1.00               | 1.00    |
| Proteobacteria, Deltaproteobacteria, Desulfovibrionales, Desulfovibrionaceae | 0.0328            | 0.0130 | 0.0117  | 0.0082 | 0.0629  | 0.0316 | 0.0221  | 0.0127 | 1.00                          | 0.92    | 0.74               | 1.00    |
| Proteobacteria, Epsilonproteobacteria, Campylobacterales, Campylobacteraceae | 0.0098            | 0.0098 | 0.0000  | 0.0000 | 0.0000  | 0.0000 | 0.0000  | 0.0000 | 1.00                          | -       | 1.00               | -       |
| Proteobacteria, Epsilonproteobacteria, Campylobacterales, Helicobacteraceae  | 0.0000            | 0.0000 | 0.0000  | 0.0000 | 0.0003  | 0.0003 | 0.0000  | 0.0000 | 1.00                          | -       | -                  | 1.00    |
| Proteobacteria, Gammaproteobacteria, Other order, Other family               | 0.0000            | 0.0000 | 0.0003  | 0.0003 | 0.0000  | 0.0000 | 0.0000  | 0.0000 | -                             | 1.00    | -                  | -       |
| Proteobacteria, Gammaproteobacteria, Enterobacteriales, Enterobacteriaceae   | 1.9746            | 0.6232 | 2.1152  | 0.9995 | 0.3964  | 0.1513 | 0.2160  | 0.0773 | 0.74                          | 0.87    | 1.00               | 1.00    |
| Proteobacteria, Gammaproteobacteria, Pasteurellales, Pasteurellaceae         | 0.0156            | 0.0062 | 0.0267  | 0.0119 | 0.0627  | 0.0289 | 0.0399  | 0.0250 | 1.00                          | 1.00    | 1.00               | 1.00    |
| Proteobacteria, Gammaproteobacteria, Pseudomonadales, Pseudomonadaceae       | 0.0002            | 0.0002 | 0.0000  | 0.0000 | 0.0002  | 0.0002 | 0.0000  | 0.0000 | 1.00                          | -       | 1.00               | 1.00    |
| Proteobacteria, Gammaproteobacteria, Xanthomonadales, Xanthomonadaceae       | 0.0000            | 0.0000 | 0.0000  | 0.0000 | 0.0000  | 0.0000 | 0.0003  | 0.0003 | 1.00                          | 0.87    | -                  | -       |
| Spirochaetes, Spirochaetia, Spirochaetales, Brachyspiraceae                  | 0.0105            | 0.0105 | 0.0033  | 0.0033 | 0.0084  | 0.0080 | 0.0737  | 0.0645 | 1.00                          | 0.87    | 1.00               | 1.00    |
| Synergistetes, Synergistia, Synergistales, Synergistaceae                    | 0.0004            | 0.0004 | 0.0050  | 0.0050 | 0.0002  | 0.0002 | 0.0007  | 0.0005 | 1.00                          | 1.00    | 1.00               | 1.00    |
| Verrucomicrobia, Verrucomicrobiae, Verrucomicrobiales, Verrucomicrobiaceae   | 0.0280            | 0.0185 | 0.0521  | 0.0319 | 0.0062  | 0.0058 | 0.0065  | 0.0065 | 1.00                          | 0.87    | 1.00               | 1.00    |

Comparisons between the *Bifal*+Arg YG and placebo groups were tested using Mann-Whitney *U* tests. Comparisons at week 0 and at week 12 were tested using Wilcoxon signed rank tests. *p*-values were adjusted using the Benjamini and Hochberg method [1].

## References

1. Benjamini, Y.; Hochberg, Y. Controlling the false discovery rate: a practical and powerful approach to multiple testing. *J. R. Statist. Soc. B (Methodological)* **1995**, 289-300.

**Supplementary Table S7.** Effect of consumption of yogurt containing *B. animalis* subsp. *lactis* and Arg (*Bifal*+Arg YG) on fecal microbiota composition (genus level)

| Genus                                                                                           | <i>Bifal</i> +Arg |        |         |        | Placebo |        |         |        | Difference (p-value)          |         |                    |         |
|-------------------------------------------------------------------------------------------------|-------------------|--------|---------|--------|---------|--------|---------|--------|-------------------------------|---------|--------------------|---------|
|                                                                                                 | Week 0            |        | Week 12 |        | Week 0  |        | Week 12 |        | <i>Bifal</i> +Arg VS. Placebo |         | Week 0 VS. Week 12 |         |
|                                                                                                 | Mean              | SEM    | Mean    | SEM    | Mean    | SEM    | Mean    | SEM    | Week 0                        | Week 12 | <i>Bifal</i> +Arg  | Placebo |
| Other phylum, Other class, Other order, Other family, Other genus                               | 0.4468            | 0.1197 | 0.5738  | 0.2846 | 0.8376  | 0.5371 | 0.7690  | 0.3498 | 1.00                          | 1.00    | 1.00               | 1.00    |
| Actinobacteria, Actinobacteria, Other order, Other family, Other genus                          | 0.0000            | 0.0000 | 0.0000  | 0.0000 | 0.0000  | 0.0000 | 0.0003  | 0.0003 | -                             | 1.00    | -                  | 1.00    |
| Actinobacteria, Actinobacteria, Acidimicrobiales, Other family, Other genus                     | 0.0006            | 0.0006 | 0.0000  | 0.0000 | 0.0000  | 0.0000 | 0.0000  | 0.0000 | 1.00                          | -       | 1.00               | -       |
| Actinobacteria, Actinobacteria, Actinomycetales, Other family, Other genus                      | 0.0014            | 0.0008 | 0.0003  | 0.0003 | 0.0014  | 0.0006 | 0.0013  | 0.0006 | 1.00                          | 1.00    | 1.00               | 1.00    |
| Actinobacteria, Actinobacteria, Actinomycetales, Actinomycetaceae, <i>Actinomyces</i>           | 0.0141            | 0.0020 | 0.0115  | 0.0031 | 0.0272  | 0.0146 | 0.0059  | 0.0023 | 1.00                          | 1.00    | 1.00               | 1.00    |
| Actinobacteria, Actinobacteria, Actinomycetales, Actinomycetaceae, <i>Trueperella</i>           | 0.0000            | 0.0000 | 0.0000  | 0.0000 | 0.0003  | 0.0003 | 0.0017  | 0.0017 | 1.00                          | 1.00    | -                  | 1.00    |
| Actinobacteria, Actinobacteria, Actinomycetales, Corynebacteriaceae, <i>Corynebacterium</i>     | 0.0018            | 0.0012 | 0.0017  | 0.0010 | 0.0003  | 0.0003 | 0.0000  | 0.0000 | 1.00                          | 1.00    | 1.00               | 1.00    |
| Actinobacteria, Actinobacteria, Actinomycetales, Dermabacteraceae, <i>Brachybacterium</i>       | 0.0000            | 0.0000 | 0.0004  | 0.0004 | 0.0000  | 0.0000 | 0.0000  | 0.0000 | -                             | 1.00    | 1.00               | -       |
| Actinobacteria, Actinobacteria, Actinomycetales, Micrococcaceae, <i>Kocuria</i>                 | 0.0000            | 0.0000 | 0.0000  | 0.0000 | 0.0000  | 0.0000 | 0.0008  | 0.0008 | -                             | 1.00    | -                  | 1.00    |
| Actinobacteria, Actinobacteria, Actinomycetales, Micrococcaceae, <i>Rothia</i>                  | 0.0033            | 0.0012 | 0.0030  | 0.0015 | 0.0099  | 0.0074 | 0.0048  | 0.0022 | 1.00                          | 1.00    | 1.00               | 1.00    |
| Actinobacteria, Actinobacteria, Actinomycetales, Propionibacteriaceae, Other genus              | 0.0000            | 0.0000 | 0.0003  | 0.0003 | 0.0000  | 0.0000 | 0.0000  | 0.0000 | 1.00                          | 1.00    | 1.00               | -       |
| Actinobacteria, Actinobacteria, Actinomycetales, Propionibacteriaceae, <i>Propionibacterium</i> | 0.0000            | 0.0000 | 0.0003  | 0.0003 | 0.0002  | 0.0002 | 0.0000  | 0.0000 | 1.00                          | 1.00    | 1.00               | 1.00    |
| Actinobacteria, Actinobacteria, Bifidobacteriales, Bifidobacteriaceae, Other genus              | 0.0015            | 0.0012 | 0.0024  | 0.0009 | 0.0022  | 0.0011 | 0.0013  | 0.0009 | 1.00                          | 1.00    | 1.00               | 1.00    |
| Actinobacteria, Actinobacteria, Bifidobacteriales, Bifidobacteriaceae, <i>Bifidobacterium</i>   | 5.4775            | 1.5724 | 10.2740 | 2.6919 | 6.3289  | 1.2233 | 9.6681  | 2.1898 | 1.00                          | 1.00    | 1.00               | 1.00    |
| Actinobacteria, Actinobacteria, Bifidobacteriales, Bifidobacteriaceae, <i>Gardnerella</i>       | 0.0000            | 0.0000 | 0.0000  | 0.0000 | 0.0000  | 0.0000 | 0.0005  | 0.0005 | -                             | 1.00    | -                  | 1.00    |
| Actinobacteria, Actinobacteria, Coriobacteriales, Coriobacteriaceae, Other genus                | 0.0593            | 0.0222 | 0.1060  | 0.0496 | 0.1886  | 0.0810 | 0.1908  | 0.0853 | 1.00                          | 1.00    | 1.00               | 1.00    |
| Actinobacteria, Actinobacteria, Coriobacteriales, Coriobacteriaceae, <i>Atopobium</i>           | 0.0011            | 0.0011 | 0.0010  | 0.0005 | 0.0046  | 0.0037 | 0.0005  | 0.0003 | 1.00                          | 1.00    | 1.00               | 1.00    |
| Actinobacteria, Actinobacteria, Coriobacteriales, Coriobacteriaceae, <i>Collinsella</i>         | 0.0427            | 0.0158 | 0.0830  | 0.0295 | 0.0787  | 0.0376 | 0.0932  | 0.0262 | 1.00                          | 1.00    | 1.00               | 1.00    |
| Actinobacteria, Actinobacteria, Coriobacteriales, Coriobacteriaceae, <i>Eggerthella</i>         | 0.0983            | 0.0405 | 0.1685  | 0.0559 | 0.0758  | 0.0222 | 0.0780  | 0.0242 | 1.00                          | 1.00    | 1.00               | 1.00    |
| Actinobacteria, Actinobacteria, Coriobacteriales, Coriobacteriaceae, <i>Enterorhabdus</i>       | 0.0000            | 0.0000 | 0.0000  | 0.0000 | 0.0000  | 0.0000 | 0.0003  | 0.0003 | -                             | 1.00    | -                  | 1.00    |
| Actinobacteria, Actinobacteria, Coriobacteriales, Coriobacteriaceae, <i>Gordonibacter</i>       | 0.0272            | 0.0151 | 0.0232  | 0.0072 | 0.0201  | 0.0093 | 0.0381  | 0.0123 | 1.00                          | 1.00    | 1.00               | 1.00    |
| Actinobacteria, Actinobacteria, Coriobacteriales, Coriobacteriaceae, <i>Olsenella</i>           | 0.0020            | 0.0018 | 0.0017  | 0.0017 | 0.0051  | 0.0038 | 0.0073  | 0.0069 | 1.00                          | 1.00    | 1.00               | 1.00    |
| Actinobacteria, Actinobacteria, Coriobacteriales, Coriobacteriaceae, <i>Paraeggerthella</i>     | 0.0000            | 0.0000 | 0.0005  | 0.0005 | 0.0000  | 0.0000 | 0.0000  | 0.0000 | -                             | 1.00    | 1.00               | -       |
| Actinobacteria, Actinobacteria, Coriobacteriales, Coriobacteriaceae, <i>Senegalimassilia</i>    | 0.0039            | 0.0036 | 0.0348  | 0.0232 | 0.0252  | 0.0153 | 0.0303  | 0.0189 | 1.00                          | 1.00    | 1.00               | 1.00    |
| Actinobacteria, Actinobacteria, Coriobacteriales, Coriobacteriaceae, <i>Slackia</i>             | 0.0224            | 0.0206 | 0.0194  | 0.0194 | 0.0004  | 0.0004 | 0.0068  | 0.0068 | 1.00                          | 1.00    | 1.00               | 1.00    |
| Bacteroidetes, Other class, Other order, Other family, Other genus                              | 0.0398            | 0.0188 | 0.0246  | 0.0139 | 0.0065  | 0.0052 | 0.0002  | 0.0002 | 1.00                          | 1.00    | 1.00               | 1.00    |
| Bacteroidetes, Bacteroidia, Bacteroidales, Other family, Other genus                            | 0.4347            | 0.2253 | 0.2761  | 0.2203 | 0.0095  | 0.0072 | 0.0137  | 0.0137 | 1.00                          | 1.00    | 1.00               | 1.00    |
| Bacteroidetes, Bacteroidia, Bacteroidales, Bacteroidaceae, <i>Bacteroides</i>                   | 16.9896           | 4.4885 | 3.7743  | 0.8389 | 11.7978 | 3.5630 | 8.9581  | 3.1323 | 1.00                          | 1.00    | 0.31               | 1.00    |
| Bacteroidetes, Bacteroidia, Bacteroidales, Porphyromonadaceae, Other genus                      | 0.0009            | 0.0007 | 0.0007  | 0.0004 | 0.0075  | 0.0075 | 0.0000  | 0.0000 | 1.00                          | 1.00    | 1.00               | 1.00    |
| Bacteroidetes, Bacteroidia, Bacteroidales, Porphyromonadaceae, <i>Barnesiella</i>               | 0.0862            | 0.0413 | 0.0708  | 0.0360 | 0.1067  | 0.0459 | 0.0885  | 0.0467 | 1.00                          | 1.00    | 1.00               | 1.00    |
| Bacteroidetes, Bacteroidia, Bacteroidales, Porphyromonadaceae, <i>Butyrivibrio</i>              | 0.0180            | 0.0073 | 0.0129  | 0.0086 | 0.0116  | 0.0046 | 0.0073  | 0.0056 | 1.00                          | 1.00    | 1.00               | 1.00    |
| Bacteroidetes, Bacteroidia, Bacteroidales, Porphyromonadaceae, <i>Odoribacter</i>               | 0.0193            | 0.0115 | 0.0036  | 0.0024 | 0.0171  | 0.0092 | 0.0088  | 0.0054 | 1.00                          | 1.00    | 1.00               | 1.00    |
| Bacteroidetes, Bacteroidia, Bacteroidales, Porphyromonadaceae, <i>Parabacteroides</i>           | 0.0537            | 0.0235 | 0.0294  | 0.0139 | 0.0582  | 0.0256 | 0.0299  | 0.0128 | 1.00                          | 1.00    | 1.00               | 1.00    |
| Bacteroidetes, Bacteroidia, Bacteroidales, Porphyromonadaceae, <i>Parabacteroides</i>           | 2.5115            | 0.8297 | 0.5847  | 0.2343 | 1.0844  | 0.2744 | 1.2650  | 0.4568 | 1.00                          | 1.00    | 1.00               | 1.00    |
| Bacteroidetes, Bacteroidia, Bacteroidales, Porphyromonadaceae, <i>Porphyromonas</i>             | 0.0008            | 0.0006 | 0.0084  | 0.0084 | 0.0000  | 0.0000 | 0.0000  | 0.0000 | 1.00                          | 1.00    | 1.00               | -       |
| Bacteroidetes, Bacteroidia, Bacteroidales, Prevotellaceae, Other genus                          | 0.8334            | 0.4874 | 0.2561  | 0.1929 | 0.1983  | 0.0865 | 0.0576  | 0.0265 | 1.00                          | 1.00    | 1.00               | 1.00    |
| Bacteroidetes, Bacteroidia, Bacteroidales, Prevotellaceae, <i>Alloprevotella</i>                | 0.0006            | 0.0006 | 0.0000  | 0.0000 | 0.0000  | 0.0000 | 0.0000  | 0.0000 | 1.00                          | -       | 1.00               | -       |
| Bacteroidetes, Bacteroidia, Bacteroidales, Prevotellaceae, <i>Paraprevotella</i>                | 0.1717            | 0.1091 | 0.0939  | 0.0816 | 0.0780  | 0.0373 | 0.0549  | 0.0362 | 1.00                          | 1.00    | 1.00               | 1.00    |
| Bacteroidetes, Bacteroidia, Bacteroidales, Prevotellaceae, <i>Prevotella</i>                    | 1.9695            | 1.0371 | 0.7830  | 0.5919 | 1.4846  | 0.8809 | 0.2761  | 0.1285 | 1.00                          | 1.00    | 1.00               | 1.00    |
| Bacteroidetes, Bacteroidia, Bacteroidales, Rikenellaceae, <i>Aliistipes</i>                     | 0.5964            | 0.1730 | 0.3051  | 0.1546 | 0.4632  | 0.2329 | 0.2936  | 0.0979 | 1.00                          | 1.00    | 1.00               | 1.00    |

Supplementary Table S7. Continued

| Genus                                                                                                | Bifal+Arg |        |         |        | Placebo |        |         |        | Difference (p-value)  |         |                    |         |
|------------------------------------------------------------------------------------------------------|-----------|--------|---------|--------|---------|--------|---------|--------|-----------------------|---------|--------------------|---------|
|                                                                                                      | Week 0    |        | Week 12 |        | Week 0  |        | Week 12 |        | Bifal+Arg VS. Placebo |         | Week 0 VS. Week 12 |         |
|                                                                                                      | Mean      | SEM    | Mean    | SEM    | Mean    | SEM    | Mean    | SEM    | Week 0                | Week 12 | Bifal+Arg          | Placebo |
| Candidatus Saccharibacteria, Other class, Other order, Other family, Other genus                     | 0.0058    | 0.0016 | 0.0099  | 0.0026 | 0.0066  | 0.0020 | 0.0083  | 0.0035 | 1.00                  | 1.00    | 1.00               | 1.00    |
| Cyanobacteria/Chloroplast, Chloroplast, Other order, Other family, Other genus                       | 0.0038    | 0.0019 | 0.0068  | 0.0037 | 0.0054  | 0.0034 | 0.0021  | 0.0012 | 1.00                  | 1.00    | 1.00               | 1.00    |
| Cyanobacteria/Chloroplast, Cyanobacteria, Other order, Other family, Other genus                     | 0.0000    | 0.0000 | 0.0000  | 0.0000 | 0.0006  | 0.0006 | 0.0000  | 0.0000 | 1.00                  | -       | -                  | 1.00    |
| Firmicutes, Other class, Other order, Other family, Other genus                                      | 0.1680    | 0.0650 | 0.1194  | 0.0336 | 0.2677  | 0.1759 | 0.2781  | 0.1460 | 1.00                  | 1.00    | 1.00               | 1.00    |
| Firmicutes, Bacilli, Other order, Other family, Other genus                                          | 0.0000    | 0.0000 | 0.0006  | 0.0006 | 0.0000  | 0.0000 | 0.0004  | 0.0004 | -                     | 1.00    | 1.00               | 1.00    |
| Firmicutes, Bacilli, Bacillales, Bacillaceae 1, <i>Bacillus</i>                                      | 0.0115    | 0.0056 | 0.0087  | 0.0061 | 0.0000  | 0.0000 | 0.0136  | 0.0098 | 1.00                  | 1.00    | 1.00               | 1.00    |
| Firmicutes, Bacilli, Bacillales, Bacillales_Incertae Sedis XI, <i>Gemella</i>                        | 0.0202    | 0.0067 | 0.0639  | 0.0422 | 0.0549  | 0.0294 | 0.0311  | 0.0086 | 1.00                  | 1.00    | 1.00               | 1.00    |
| Firmicutes, Bacilli, Bacillales, Listeriaceae, <i>Brochothrix</i>                                    | 0.0000    | 0.0000 | 0.0000  | 0.0000 | 0.1083  | 0.1083 | 0.0000  | 0.0000 | 1.00                  | -       | -                  | 1.00    |
| Firmicutes, Bacilli, Bacillales, Paenibacillaceae 1, <i>Paenibacillus</i>                            | 0.0000    | 0.0000 | 0.0000  | 0.0000 | 0.0005  | 0.0005 | 0.0000  | 0.0000 | 1.00                  | -       | -                  | 1.00    |
| Firmicutes, Bacilli, Bacillales, Staphylococcaceae, <i>Staphylococcus</i>                            | 0.0022    | 0.0015 | 0.0015  | 0.0010 | 0.0043  | 0.0037 | 0.0008  | 0.0006 | 1.00                  | 1.00    | 1.00               | 1.00    |
| Firmicutes, Bacilli, Lactobacillales, Other family, Other genus                                      | 0.0007    | 0.0005 | 0.0006  | 0.0004 | 0.0003  | 0.0003 | 0.0011  | 0.0008 | 1.00                  | 1.00    | 1.00               | 1.00    |
| Firmicutes, Bacilli, Lactobacillales, Aerococcaceae, <i>Abiotrophia</i>                              | 0.0021    | 0.0013 | 0.0097  | 0.0052 | 0.0004  | 0.0004 | 0.0003  | 0.0003 | 1.00                  | 1.00    | 1.00               | 1.00    |
| Firmicutes, Bacilli, Lactobacillales, Carnobacteriaceae, <i>Atopostipes</i>                          | 0.0000    | 0.0000 | 0.0000  | 0.0000 | 0.0004  | 0.0004 | 0.0000  | 0.0000 | 1.00                  | -       | -                  | 1.00    |
| Firmicutes, Bacilli, Lactobacillales, Carnobacteriaceae, <i>Carnobacterium</i>                       | 0.0006    | 0.0005 | 0.0000  | 0.0000 | 0.2053  | 0.2053 | 0.0000  | 0.0000 | 1.00                  | -       | 1.00               | 1.00    |
| Firmicutes, Bacilli, Lactobacillales, Carnobacteriaceae, <i>Granulicatella</i>                       | 0.0170    | 0.0054 | 0.0133  | 0.0054 | 0.0291  | 0.0117 | 0.0169  | 0.0072 | 1.00                  | 1.00    | 1.00               | 1.00    |
| Firmicutes, Bacilli, Lactobacillales, Enterococcaceae, Other genus                                   | 0.0004    | 0.0004 | 0.0000  | 0.0000 | 0.0000  | 0.0000 | 0.0000  | 0.0000 | 1.00                  | -       | 1.00               | -       |
| Firmicutes, Bacilli, Lactobacillales, Enterococcaceae, <i>Enterococcus</i>                           | 0.3183    | 0.1865 | 0.4910  | 0.2445 | 0.0160  | 0.0094 | 0.0310  | 0.0211 | 1.00                  | 1.00    | 1.00               | 1.00    |
| Firmicutes, Bacilli, Lactobacillales, Enterococcaceae, <i>Vagococcus</i>                             | 0.0000    | 0.0000 | 0.0000  | 0.0000 | 0.0075  | 0.0075 | 0.0000  | 0.0000 | 1.00                  | -       | -                  | 1.00    |
| Firmicutes, Bacilli, Lactobacillales, Lactobacillaceae, <i>Lactobacillus</i>                         | 0.4799    | 0.2454 | 1.4538  | 0.7806 | 0.2481  | 0.1928 | 0.1445  | 0.0982 | 1.00                  | 1.00    | 1.00               | 1.00    |
| Firmicutes, Bacilli, Lactobacillales, Lactobacillaceae, <i>Pedifoccus</i>                            | 0.0362    | 0.0362 | 0.0115  | 0.0115 | 0.0000  | 0.0000 | 0.0000  | 0.0000 | 1.00                  | 1.00    | 1.00               | -       |
| Firmicutes, Bacilli, Lactobacillales, Leuconostocaceae, <i>Leuconostoc</i>                           | 0.0007    | 0.0004 | 0.0009  | 0.0006 | 0.0179  | 0.0148 | 0.0020  | 0.0010 | 1.00                  | 1.00    | 1.00               | 1.00    |
| Firmicutes, Bacilli, Lactobacillales, Streptococcaceae, <i>Lactococcus</i>                           | 0.0022    | 0.0015 | 0.0037  | 0.0028 | 0.0027  | 0.0013 | 0.0052  | 0.0029 | 1.00                  | 1.00    | 1.00               | 1.00    |
| Firmicutes, Bacilli, Lactobacillales, Streptococcaceae, <i>Streptococcus</i>                         | 2.2131    | 0.8107 | 9.0795  | 2.7556 | 5.6980  | 3.8053 | 6.5435  | 1.7118 | 1.00                  | 1.00    | 0.16               | 1.00    |
| Firmicutes, Clostridia, Other order, Other family, Other genus                                       | 0.0083    | 0.0065 | 0.0028  | 0.0028 | 0.0188  | 0.0166 | 0.0186  | 0.0177 | 1.00                  | 1.00    | 1.00               | 1.00    |
| Firmicutes, Clostridia, Clostridiales, Other family, Other genus                                     | 1.2237    | 0.4949 | 0.7063  | 0.2012 | 0.5991  | 0.2854 | 0.6487  | 0.3270 | 1.00                  | 1.00    | 1.00               | 1.00    |
| Firmicutes, Clostridia, Clostridiales, Catabacteriaceae, <i>Catabacter</i>                           | 0.0025    | 0.0014 | 0.0086  | 0.0048 | 0.0024  | 0.0013 | 0.0008  | 0.0006 | 1.00                  | 1.00    | 1.00               | 1.00    |
| Firmicutes, Clostridia, Clostridiales, Christensenellaceae, <i>Christensenella</i>                   | 0.0007    | 0.0007 | 0.0037  | 0.0037 | 0.0054  | 0.0034 | 0.0064  | 0.0040 | 1.00                  | 1.00    | 1.00               | 1.00    |
| Firmicutes, Clostridia, Clostridiales, Clostridiaceae 1, Other genus                                 | 0.0009    | 0.0009 | 0.0010  | 0.0010 | 0.0005  | 0.0003 | 0.0000  | 0.0000 | 1.00                  | 1.00    | 1.00               | 1.00    |
| Firmicutes, Clostridia, Clostridiales, Clostridiaceae 1, <i>Clostridium sensu stricto</i>            | 0.1979    | 0.0931 | 0.8468  | 0.7824 | 0.0415  | 0.0173 | 0.0706  | 0.0264 | 1.00                  | 1.00    | 1.00               | 1.00    |
| Firmicutes, Clostridia, Clostridiales, Clostridiales, Clostridiales_Incertae.Sedis.XIII, Other genus | 0.0450    | 0.0199 | 0.1123  | 0.0354 | 0.0869  | 0.0351 | 0.0894  | 0.0732 | 1.00                  | 1.00    | 1.00               | 1.00    |
| Firmicutes, Clostridia, Clostridiales, Clostridiales_Incertae Sedis XI, <i>Anaerococcus</i>          | 0.0011    | 0.0006 | 0.0019  | 0.0019 | 0.0003  | 0.0003 | 0.0009  | 0.0005 | 1.00                  | 1.00    | 1.00               | 1.00    |
| Firmicutes, Clostridia, Clostridiales, Clostridiales_Incertae Sedis XI, <i>Ezakiella</i>             | 0.0000    | 0.0000 | 0.0000  | 0.0000 | 0.0003  | 0.0003 | 0.0000  | 0.0000 | 1.00                  | -       | -                  | 1.00    |
| Firmicutes, Clostridia, Clostridiales, Clostridiales_Incertae Sedis XI, <i>Finagoldia</i>            | 0.0031    | 0.0020 | 0.0025  | 0.0011 | 0.0033  | 0.0012 | 0.0006  | 0.0006 | 1.00                  | 1.00    | 1.00               | 1.00    |
| Firmicutes, Clostridia, Clostridiales, Clostridiales_Incertae Sedis XI, <i>Murdochella</i>           | 0.0006    | 0.0006 | 0.0003  | 0.0003 | 0.0000  | 0.0000 | 0.0000  | 0.0000 | 1.00                  | 1.00    | 1.00               | -       |
| Firmicutes, Clostridia, Clostridiales, Clostridiales_Incertae Sedis XI, <i>Parvimonas</i>            | 0.0014    | 0.0006 | 0.0440  | 0.0261 | 0.0016  | 0.0006 | 0.0031  | 0.0021 | 1.00                  | 1.00    | 1.00               | 1.00    |
| Firmicutes, Clostridia, Clostridiales, Clostridiales_Incertae Sedis XIII, <i>Anaerovorax</i>         | 0.1770    | 0.0734 | 0.2631  | 0.0922 | 0.2766  | 0.0948 | 0.3030  | 0.0999 | 1.00                  | 1.00    | 1.00               | 1.00    |
| Firmicutes, Clostridia, Clostridiales, Clostridiales_Incertae Sedis XIII, <i>Mogibacterium</i>       | 0.0004    | 0.0004 | 0.0003  | 0.0003 | 0.0000  | 0.0000 | 0.0000  | 0.0000 | 1.00                  | 1.00    | 1.00               | -       |
| Firmicutes, Clostridia, Clostridiales, Eubacteriaceae, <i>Anaerofustis</i>                           | 0.0056    | 0.0027 | 0.0084  | 0.0030 | 0.0047  | 0.0015 | 0.0048  | 0.0024 | 1.00                  | 1.00    | 1.00               | 1.00    |
| Firmicutes, Clostridia, Clostridiales, Eubacteriaceae, <i>Eubacterium</i>                            | 0.0855    | 0.0668 | 0.1706  | 0.1079 | 0.0539  | 0.0247 | 0.0689  | 0.0289 | 1.00                  | 1.00    | 1.00               | 1.00    |
| Firmicutes, Clostridia, Clostridiales, Eubacteriaceae, Other genus                                   | 0.0000    | 0.0000 | 0.0000  | 0.0000 | 0.0342  | 0.0342 | 0.0135  | 0.0135 | 1.00                  | 1.00    | -                  | 1.00    |
| Firmicutes, Clostridia, Clostridiales, Lachnospiraceae, Other genus                                  | 7.3112    | 0.6341 | 10.8910 | 2.0492 | 11.9779 | 2.2694 | 14.4892 | 3.4438 | 1.00                  | 1.00    | 1.00               | 1.00    |
| Firmicutes, Clostridia, Clostridiales, Lachnospiraceae, <i>Anaerostipes</i>                          | 2.7832    | 0.7368 | 3.7958  | 0.9211 | 4.0548  | 1.2317 | 3.5647  | 1.0190 | 1.00                  | 1.00    | 1.00               | 1.00    |
| Firmicutes, Clostridia, Clostridiales, Lachnospiraceae, <i>Blautia</i>                               | 12.7611   | 1.5752 | 16.3307 | 1.4928 | 10.1640 | 1.1359 | 10.7721 | 1.3842 | 1.00                  | 1.00    | 1.00               | 1.00    |



Supplementary Table S7. Continued

| Genus                                                                                           | Bifal+Arg |        |         |        | Placebo |        |         |        | Difference (p-value)  |         |                    |         |
|-------------------------------------------------------------------------------------------------|-----------|--------|---------|--------|---------|--------|---------|--------|-----------------------|---------|--------------------|---------|
|                                                                                                 | Week 0    |        | Week 12 |        | Week 0  |        | Week 12 |        | Bifal+Arg VS. Placebo |         | Week 0 VS. Week 12 |         |
|                                                                                                 | Mean      | SEM    | Mean    | SEM    | Mean    | SEM    | Mean    | SEM    | Week 0                | Week 12 | Bifal+Arg          | Placebo |
| Firmicutes, Clostridia, Clostridiales, Lachnospiraceae, <i>Clostridium XIVa</i>                 | 1.2307    | 0.3544 | 0.4075  | 0.0841 | 1.5590  | 0.5594 | 1.0897  | 0.3746 | 1.00                  | 1.00    | 1.00               | 1.00    |
| Firmicutes, Clostridia, Clostridiales, Lachnospiraceae, <i>Clostridium XIVb</i>                 | 0.0751    | 0.0405 | 0.1514  | 0.1201 | 0.1698  | 0.1260 | 0.0804  | 0.0373 | 1.00                  | 1.00    | 1.00               | 1.00    |
| Firmicutes, Clostridia, Clostridiales, Lachnospiraceae, <i>Coprococcus</i>                      | 0.3295    | 0.2483 | 0.3058  | 0.2164 | 0.1148  | 0.0595 | 0.2482  | 0.1468 | 1.00                  | 1.00    | 1.00               | 1.00    |
| Firmicutes, Clostridia, Clostridiales, Lachnospiraceae, <i>Dorea</i>                            | 0.7804    | 0.2861 | 0.9985  | 0.3143 | 1.1839  | 0.3064 | 1.4933  | 0.5007 | 1.00                  | 1.00    | 1.00               | 1.00    |
| Firmicutes, Clostridia, Clostridiales, Lachnospiraceae, <i>Eisenbergiella</i>                   | 0.0496    | 0.0237 | 0.0880  | 0.0389 | 0.0340  | 0.0216 | 0.0383  | 0.0176 | 1.00                  | 1.00    | 1.00               | 1.00    |
| Firmicutes, Clostridia, Clostridiales, Lachnospiraceae, <i>Fusicatenibacter</i>                 | 2.2636    | 0.7281 | 4.6474  | 1.6945 | 3.1636  | 0.8620 | 2.7943  | 0.9358 | 1.00                  | 1.00    | 1.00               | 1.00    |
| Firmicutes, Clostridia, Clostridiales, Lachnospiraceae, <i>Howardella</i>                       | 0.0005    | 0.0005 | 0.0029  | 0.0029 | 0.0000  | 0.0000 | 0.0000  | 0.0000 | 1.00                  | 1.00    | 1.00               | -       |
| Firmicutes, Clostridia, Clostridiales, Lachnospiraceae, <i>Hungatella</i>                       | 0.0062    | 0.0044 | 0.0104  | 0.0054 | 0.0122  | 0.0078 | 0.0135  | 0.0056 | 1.00                  | 1.00    | 1.00               | 1.00    |
| Firmicutes, Clostridia, Clostridiales, Lachnospiraceae, <i>Lachnoanaerobaculum</i>              | 0.0000    | 0.0000 | 0.0003  | 0.0003 | 0.0000  | 0.0000 | 0.0006  | 0.0006 | -                     | 1.00    | 1.00               | 1.00    |
| Firmicutes, Clostridia, Clostridiales, Lachnospiraceae, <i>Lachnospiraceae incertae sedis</i>   | 7.6101    | 2.6875 | 6.6192  | 1.6844 | 7.0984  | 1.7810 | 7.5811  | 1.9140 | 1.00                  | 1.00    | 1.00               | 1.00    |
| Firmicutes, Clostridia, Clostridiales, Lachnospiraceae, <i>Lactonifactor</i>                    | 0.0303    | 0.0259 | 0.0218  | 0.0123 | 0.0250  | 0.0126 | 0.0154  | 0.0083 | 1.00                  | 1.00    | 1.00               | 1.00    |
| Firmicutes, Clostridia, Clostridiales, Lachnospiraceae, <i>Murimonas</i>                        | 0.0008    | 0.0008 | 0.0000  | 0.0000 | 0.0000  | 0.0000 | 0.0000  | 0.0000 | 1.00                  | -       | 1.00               | -       |
| Firmicutes, Clostridia, Clostridiales, Lachnospiraceae, <i>Oribacterium</i>                     | 0.0005    | 0.0003 | 0.0016  | 0.0007 | 0.0003  | 0.0003 | 0.0018  | 0.0011 | 1.00                  | 1.00    | 1.00               | 1.00    |
| Firmicutes, Clostridia, Clostridiales, Lachnospiraceae, <i>Robinsoniella</i>                    | 0.0000    | 0.0000 | 0.0027  | 0.0027 | 0.0000  | 0.0000 | 0.0000  | 0.0000 | -                     | 1.00    | 1.00               | -       |
| Firmicutes, Clostridia, Clostridiales, Lachnospiraceae, <i>Roseburia</i>                        | 2.5363    | 1.2481 | 0.8731  | 0.2538 | 1.4126  | 0.4523 | 1.1089  | 0.3540 | 1.00                  | 1.00    | 1.00               | 1.00    |
| Firmicutes, Clostridia, Clostridiales, Lachnospiraceae, <i>Ruminococcus 2</i>                   | 1.1781    | 0.4972 | 0.7942  | 0.3354 | 1.0035  | 0.2952 | 1.1621  | 0.5335 | 1.00                  | 1.00    | 1.00               | 1.00    |
| Firmicutes, Clostridia, Clostridiales, Lachnospiraceae, <i>Shuttleworthia</i>                   | 0.0003    | 0.0003 | 0.0000  | 0.0000 | 0.0000  | 0.0000 | 0.0000  | 0.0000 | 1.00                  | -       | 1.00               | -       |
| Firmicutes, Clostridia, Clostridiales, Lachnospiraceae, <i>Syntrophococcus</i>                  | 0.0000    | 0.0000 | 0.0000  | 0.0000 | 0.0000  | 0.0000 | 0.0002  | 0.0002 | -                     | 1.00    | -                  | 1.00    |
| Firmicutes, Clostridia, Clostridiales, Peptoniphilaceae, <i>Peptoniphilus</i>                   | 0.0037    | 0.0018 | 0.0048  | 0.0025 | 0.0019  | 0.0010 | 0.0010  | 0.0007 | 1.00                  | 1.00    | 1.00               | 1.00    |
| Firmicutes, Clostridia, Clostridiales, Peptostreptococcaceae, <i>Clostridium XI</i>             | 0.0485    | 0.0485 | 0.1287  | 0.1136 | 0.0000  | 0.0000 | 0.0000  | 0.0000 | 1.00                  | 1.00    | 1.00               | -       |
| Firmicutes, Clostridia, Clostridiales, Peptostreptococcaceae, <i>Intestinibacter</i>            | 0.9636    | 0.4575 | 0.8757  | 0.4084 | 0.4938  | 0.2507 | 2.2227  | 1.2564 | 1.00                  | 1.00    | 1.00               | 1.00    |
| Firmicutes, Clostridia, Clostridiales, Peptostreptococcaceae, Other genus                       | 0.0389    | 0.0143 | 0.0446  | 0.0143 | 0.0297  | 0.0108 | 0.0765  | 0.0300 | 1.00                  | 1.00    | 1.00               | 1.00    |
| Firmicutes, Clostridia, Clostridiales, Peptostreptococcaceae, <i>Peptostreptococcus</i>         | 0.0129    | 0.0052 | 0.0371  | 0.0232 | 0.0221  | 0.0120 | 0.0118  | 0.0066 | 1.00                  | 1.00    | 1.00               | 1.00    |
| Firmicutes, Clostridia, Clostridiales, Peptostreptococcaceae, <i>Romboutsia</i>                 | 0.9731    | 0.4800 | 0.7349  | 0.3285 | 0.8060  | 0.2343 | 0.7686  | 0.2511 | 1.00                  | 1.00    | 1.00               | 1.00    |
| Firmicutes, Clostridia, Clostridiales, Peptostreptococcaceae, <i>Terrisporobacter</i>           | 0.2909    | 0.2736 | 0.0440  | 0.0263 | 0.0402  | 0.0307 | 0.0827  | 0.0390 | 1.00                  | 1.00    | 1.00               | 1.00    |
| Firmicutes, Clostridia, Clostridiales, Ruminococcaceae, <i>Anaerofilum</i>                      | 0.0008    | 0.0005 | 0.0011  | 0.0011 | 0.0019  | 0.0012 | 0.0009  | 0.0006 | 1.00                  | 1.00    | 1.00               | 1.00    |
| Firmicutes, Clostridia, Clostridiales, Ruminococcaceae, <i>Anaerotruncus</i>                    | 0.0093    | 0.0037 | 0.0024  | 0.0012 | 0.0053  | 0.0023 | 0.0045  | 0.0022 | 1.00                  | 1.00    | 1.00               | 1.00    |
| Firmicutes, Clostridia, Clostridiales, Ruminococcaceae, <i>Butyricoccus</i>                     | 0.4481    | 0.1065 | 0.8163  | 0.1817 | 0.7758  | 0.1715 | 0.8882  | 0.1289 | 1.00                  | 1.00    | 1.00               | 1.00    |
| Firmicutes, Clostridia, Clostridiales, Ruminococcaceae, <i>Clostridium IV</i>                   | 0.1778    | 0.0838 | 0.0861  | 0.0308 | 0.2281  | 0.0853 | 0.1413  | 0.0577 | 1.00                  | 1.00    | 1.00               | 1.00    |
| Firmicutes, Clostridia, Clostridiales, Ruminococcaceae, <i>Faecalibacterium</i>                 | 4.7356    | 1.0962 | 5.5405  | 1.5218 | 6.9576  | 1.8497 | 5.1520  | 1.7276 | 1.00                  | 1.00    | 1.00               | 1.00    |
| Firmicutes, Clostridia, Clostridiales, Ruminococcaceae, <i>Flavonifractor</i>                   | 0.1321    | 0.0333 | 0.1981  | 0.0585 | 0.1351  | 0.0658 | 0.1335  | 0.0367 | 1.00                  | 1.00    | 1.00               | 1.00    |
| Firmicutes, Clostridia, Clostridiales, Ruminococcaceae, <i>Intestinimonas</i>                   | 0.0063    | 0.0040 | 0.0242  | 0.0182 | 0.0019  | 0.0011 | 0.0057  | 0.0025 | 1.00                  | 1.00    | 1.00               | 1.00    |
| Firmicutes, Clostridia, Clostridiales, Ruminococcaceae, <i>Oscillibacter</i>                    | 0.5850    | 0.4572 | 0.1534  | 0.0644 | 0.1781  | 0.0723 | 0.1437  | 0.0802 | 1.00                  | 1.00    | 1.00               | 1.00    |
| Firmicutes, Clostridia, Clostridiales, Ruminococcaceae, Other genus                             | 5.4794    | 1.5143 | 6.3345  | 1.9010 | 6.1176  | 1.5179 | 4.9729  | 1.2200 | 1.00                  | 1.00    | 1.00               | 1.00    |
| Firmicutes, Clostridia, Clostridiales, Ruminococcaceae, <i>Pseudoflavonifractor</i>             | 0.0418    | 0.0167 | 0.0280  | 0.0107 | 0.0575  | 0.0201 | 0.0752  | 0.0292 | 1.00                  | 1.00    | 1.00               | 1.00    |
| Firmicutes, Clostridia, Clostridiales, Ruminococcaceae, <i>Ruminococcus</i>                     | 0.5890    | 0.2094 | 0.5673  | 0.2639 | 0.2972  | 0.1361 | 0.2243  | 0.1159 | 1.00                  | 1.00    | 1.00               | 1.00    |
| Firmicutes, Clostridia, Clostridiales, Ruminococcaceae, <i>Sporobacter</i>                      | 0.0003    | 0.0003 | 0.0000  | 0.0000 | 0.0000  | 0.0000 | 0.0002  | 0.0002 | 1.00                  | 1.00    | 1.00               | 1.00    |
| Firmicutes, Clostridia, Clostridiales, Ruminococcaceae, <i>Subdoligranulum</i>                  | 0.0231    | 0.0067 | 0.0200  | 0.0096 | 0.0159  | 0.0034 | 0.0152  | 0.0037 | 1.00                  | 1.00    | 1.00               | 1.00    |
| Firmicutes, Erysipelotrichia, Erysipelotrichales, Erysipelotrichaceae, Other genus              | 1.6355    | 0.5786 | 1.7473  | 0.5765 | 0.6273  | 0.2037 | 1.4850  | 0.7422 | 1.00                  | 1.00    | 1.00               | 1.00    |
| Firmicutes, Erysipelotrichia, Erysipelotrichales, Erysipelotrichaceae, <i>Bulleidia</i>         | 0.0000    | 0.0000 | 0.0000  | 0.0000 | 0.0007  | 0.0007 | 0.0000  | 0.0000 | 1.00                  | -       | -                  | 1.00    |
| Firmicutes, Erysipelotrichia, Erysipelotrichales, Erysipelotrichaceae, <i>Catenibacterium</i>   | 0.0537    | 0.0530 | 0.0225  | 0.0215 | 1.1799  | 0.9406 | 1.8419  | 1.3018 | 1.00                  | 1.00    | 1.00               | 1.00    |
| Firmicutes, Erysipelotrichia, Erysipelotrichales, Erysipelotrichaceae, <i>Clostridium XVIII</i> | 1.1454    | 0.6376 | 1.0430  | 0.3120 | 0.7452  | 0.3217 | 1.2358  | 0.5301 | 1.00                  | 1.00    | 1.00               | 1.00    |
| Firmicutes, Erysipelotrichia, Erysipelotrichales, Erysipelotrichaceae, <i>Coprobacillus</i>     | 0.0169    | 0.0113 | 0.0482  | 0.0240 | 0.0104  | 0.0064 | 0.0030  | 0.0018 | 1.00                  | 1.00    | 1.00               | 1.00    |

Supplementary Table S7. Continued

| Genus                                                                                                            | Bifal+Arg |        |         |        | Placebo |        |         |        | Difference (p-value)  |         |                    |         |
|------------------------------------------------------------------------------------------------------------------|-----------|--------|---------|--------|---------|--------|---------|--------|-----------------------|---------|--------------------|---------|
|                                                                                                                  | Week 0    |        | Week 12 |        | Week 0  |        | Week 12 |        | Bifal+Arg VS. Placebo |         | Week 0 VS. Week 12 |         |
|                                                                                                                  | Mean      | SEM    | Mean    | SEM    | Mean    | SEM    | Mean    | SEM    | Week 0                | Week 12 | Bifal+Arg          | Placebo |
| Firmicutes, Erysipelotrichia, Erysipelotrichales, Erysipelotrichaceae, <i>Erysipelotrichaceae incertae sedis</i> | 0.9461    | 0.6509 | 0.6851  | 0.3180 | 0.1273  | 0.0443 | 0.1623  | 0.0763 | 1.00                  | 1.00    | 1.00               | 1.00    |
| Firmicutes, Erysipelotrichia, Erysipelotrichales, Erysipelotrichaceae, <i>Faecalicoccus</i>                      | 0.0006    | 0.0006 | 0.0000  | 0.0000 | 0.0000  | 0.0000 | 0.0000  | 0.0000 | 1.00                  | -       | 1.00               | -       |
| Firmicutes, Erysipelotrichia, Erysipelotrichales, Erysipelotrichaceae, <i>Holdemania</i>                         | 0.3908    | 0.2719 | 0.1776  | 0.1366 | 1.0524  | 0.7122 | 1.5698  | 1.0899 | 1.00                  | 1.00    | 1.00               | 1.00    |
| Firmicutes, Erysipelotrichia, Erysipelotrichales, Erysipelotrichaceae, <i>Holdemania</i>                         | 0.0094    | 0.0035 | 0.0188  | 0.0119 | 0.0166  | 0.0060 | 0.0242  | 0.0094 | 1.00                  | 1.00    | 1.00               | 1.00    |
| Firmicutes, Erysipelotrichia, Erysipelotrichales, Erysipelotrichaceae, <i>Solobacterium</i>                      | 0.0042    | 0.0011 | 0.0181  | 0.0116 | 0.0101  | 0.0068 | 0.0048  | 0.0026 | 1.00                  | 1.00    | 1.00               | 1.00    |
| Firmicutes, Erysipelotrichia, Erysipelotrichales, Erysipelotrichaceae, <i>Turicibacter</i>                       | 0.2237    | 0.0849 | 0.1964  | 0.1156 | 0.5031  | 0.2133 | 0.1216  | 0.0456 | 1.00                  | 1.00    | 1.00               | 1.00    |
| Firmicutes, Negativicutes, Selenomonadales, Acidaminococcaceae, Other genus                                      | 0.0360    | 0.0330 | 0.0054  | 0.0030 | 0.0190  | 0.0190 | 0.0039  | 0.0039 | 1.00                  | 1.00    | 1.00               | 1.00    |
| Firmicutes, Negativicutes, Selenomonadales, Acidaminococcaceae, <i>Acidaminococcus</i>                           | 0.0600    | 0.0316 | 0.0363  | 0.0258 | 0.1234  | 0.0587 | 0.0449  | 0.0242 | 1.00                  | 1.00    | 1.00               | 1.00    |
| Firmicutes, Negativicutes, Selenomonadales, Acidaminococcaceae, <i>Phascolarctobacterium</i>                     | 0.2022    | 0.0919 | 0.0188  | 0.0170 | 0.1624  | 0.0781 | 0.1876  | 0.1413 | 1.00                  | 1.00    | 1.00               | 1.00    |
| Firmicutes, Negativicutes, Selenomonadales, Veillonellaceae, Other genus                                         | 0.0622    | 0.0377 | 0.0407  | 0.0179 | 0.0214  | 0.0182 | 0.0075  | 0.0064 | 1.00                  | 1.00    | 1.00               | 1.00    |
| Firmicutes, Negativicutes, Selenomonadales, Veillonellaceae, <i>Allisonella</i>                                  | 0.0291    | 0.0162 | 0.0103  | 0.0043 | 0.0211  | 0.0088 | 0.0089  | 0.0049 | 1.00                  | 1.00    | 1.00               | 1.00    |
| Firmicutes, Negativicutes, Selenomonadales, Veillonellaceae, <i>Anaeroglobus</i>                                 | 0.0002    | 0.0002 | 0.0000  | 0.0000 | 0.0000  | 0.0000 | 0.0000  | 0.0000 | 1.00                  | -       | 1.00               | -       |
| Firmicutes, Negativicutes, Selenomonadales, Veillonellaceae, <i>Dialister</i>                                    | 0.0940    | 0.0476 | 0.0872  | 0.0785 | 0.4061  | 0.1921 | 0.2426  | 0.1666 | 1.00                  | 1.00    | 1.00               | 1.00    |
| Firmicutes, Negativicutes, Selenomonadales, Veillonellaceae, <i>Megamonas</i>                                    | 2.0648    | 1.7889 | 0.4636  | 0.4579 | 2.1429  | 1.5687 | 1.7080  | 0.8655 | 1.00                  | 1.00    | 1.00               | 1.00    |
| Firmicutes, Negativicutes, Selenomonadales, Veillonellaceae, <i>Megasphaera</i>                                  | 0.3333    | 0.1456 | 0.1172  | 0.0506 | 2.4914  | 1.6603 | 0.4229  | 0.1686 | 1.00                  | 1.00    | 1.00               | 1.00    |
| Firmicutes, Negativicutes, Selenomonadales, Veillonellaceae, <i>Mitsuokella</i>                                  | 0.2688    | 0.2414 | 0.0547  | 0.0426 | 0.0038  | 0.0024 | 0.0065  | 0.0049 | 1.00                  | 1.00    | 1.00               | 1.00    |
| Firmicutes, Negativicutes, Selenomonadales, Veillonellaceae, <i>Propionispira</i>                                | 0.0004    | 0.0004 | 0.0000  | 0.0000 | 0.0000  | 0.0000 | 0.0000  | 0.0000 | 1.00                  | -       | 1.00               | -       |
| Firmicutes, Negativicutes, Selenomonadales, Veillonellaceae, <i>Veillonella</i>                                  | 0.3172    | 0.1586 | 0.0898  | 0.0412 | 0.0965  | 0.0447 | 0.0723  | 0.0323 | 1.00                  | 1.00    | 1.00               | 1.00    |
| Fusobacteria, Fusobacteriia, Fusobacteriales, Fusobacteriaceae, Other genus                                      | 0.0226    | 0.0222 | 0.0004  | 0.0004 | 0.0026  | 0.0023 | 0.0166  | 0.0166 | 1.00                  | 1.00    | 1.00               | 1.00    |
| Fusobacteria, Fusobacteriia, Fusobacteriales, Fusobacteriaceae, <i>Fusobacterium</i>                             | 1.0852    | 0.7860 | 0.0557  | 0.0410 | 0.5811  | 0.3056 | 0.7276  | 0.6832 | 1.00                  | 1.00    | 1.00               | 1.00    |
| Fusobacteria, Fusobacteriia, Fusobacteriales, Leptotrichiaceae, <i>Sneathia</i>                                  | 0.0006    | 0.0006 | 0.0000  | 0.0000 | 0.0000  | 0.0000 | 0.0000  | 0.0000 | 1.00                  | -       | 1.00               | -       |
| Lentisphaerae, Lentisphaeria, Victivallales, Victivallaceae, <i>Victivallis</i>                                  | 0.0012    | 0.0012 | 0.0000  | 0.0000 | 0.0003  | 0.0003 | 0.0000  | 0.0000 | 1.00                  | -       | 1.00               | 1.00    |
| Proteobacteria, Other class, Other order, Other family, Other genus                                              | 0.0010    | 0.0010 | 0.0013  | 0.0013 | 0.0004  | 0.0004 | 0.0000  | 0.0000 | 1.00                  | 1.00    | 1.00               | 1.00    |
| Proteobacteria, Alphaproteobacteria, Other order, Other family, Other genus                                      | 0.0003    | 0.0003 | 0.0040  | 0.0040 | 0.0000  | 0.0000 | 0.0000  | 0.0000 | 1.00                  | 1.00    | 1.00               | -       |
| Proteobacteria, Alphaproteobacteria, Caulobacteriales, Caulobacteraceae, <i>Brevundimonas</i>                    | 0.0003    | 0.0003 | 0.0000  | 0.0000 | 0.0000  | 0.0000 | 0.0004  | 0.0004 | 1.00                  | 1.00    | 1.00               | 1.00    |
| Proteobacteria, Alphaproteobacteria, Rhizobiales, Methylobacteriaceae, <i>Methylobacterium</i>                   | 0.0000    | 0.0000 | 0.0000  | 0.0000 | 0.0000  | 0.0000 | 0.0003  | 0.0003 | -                     | 1.00    | -                  | 1.00    |
| Proteobacteria, Alphaproteobacteria, Sphingomonadales, Sphingomonadaceae, <i>Sphingomonas</i>                    | 0.0000    | 0.0000 | 0.0003  | 0.0003 | 0.0000  | 0.0000 | 0.0000  | 0.0000 | -                     | 1.00    | 1.00               | -       |
| Proteobacteria, Betaproteobacteria, Other order, Other family, Other genus                                       | 0.0119    | 0.0090 | 0.0003  | 0.0003 | 0.0386  | 0.0373 | 0.0029  | 0.0022 | 1.00                  | 1.00    | 1.00               | 1.00    |
| Proteobacteria, Betaproteobacteria, Burkholderiales, Comamonadaceae, <i>Pelomonas</i>                            | 0.0000    | 0.0000 | 0.0003  | 0.0003 | 0.0000  | 0.0000 | 0.0000  | 0.0000 | -                     | 1.00    | 1.00               | -       |
| Proteobacteria, Betaproteobacteria, Burkholderiales, Oxalobacteraceae, <i>Oxalobacter</i>                        | 0.0003    | 0.0003 | 0.0007  | 0.0007 | 0.0036  | 0.0036 | 0.0137  | 0.0137 | 1.00                  | 1.00    | 1.00               | 1.00    |
| Proteobacteria, Betaproteobacteria, Burkholderiales, Sutterellaceae, <i>Parasutterella</i>                       | 0.4212    | 0.2013 | 0.2782  | 0.1307 | 0.1933  | 0.1479 | 0.0796  | 0.0480 | 1.00                  | 1.00    | 1.00               | 1.00    |
| Proteobacteria, Betaproteobacteria, Burkholderiales, Sutterellaceae, <i>Sutterella</i>                           | 0.0148    | 0.0076 | 0.0020  | 0.0017 | 0.0080  | 0.0041 | 0.0098  | 0.0074 | 1.00                  | 1.00    | 1.00               | 1.00    |
| Proteobacteria, Deltaproteobacteria, Desulfovibrionales, Other family, Other genus                               | 0.0003    | 0.0003 | 0.0008  | 0.0008 | 0.0011  | 0.0011 | 0.0007  | 0.0007 | 1.00                  | 1.00    | 1.00               | 1.00    |
| Proteobacteria, Deltaproteobacteria, Desulfovibrionales, Desulfovibrionaceae, <i>Bilophila</i>                   | 0.0222    | 0.0075 | 0.0114  | 0.0082 | 0.0258  | 0.0109 | 0.0084  | 0.0037 | 1.00                  | 1.00    | 1.00               | 1.00    |
| Proteobacteria, Deltaproteobacteria, Desulfovibrionales, Desulfovibrionaceae, <i>Desulfovibrio</i>               | 0.0106    | 0.0097 | 0.0003  | 0.0003 | 0.0343  | 0.0247 | 0.0125  | 0.0108 | 1.00                  | 1.00    | 1.00               | 1.00    |
| Proteobacteria, Deltaproteobacteria, Desulfovibrionales, Desulfovibrionaceae, Other genus                        | 0.0000    | 0.0000 | 0.0000  | 0.0000 | 0.0028  | 0.0028 | 0.0012  | 0.0012 | 1.00                  | 1.00    | -                  | 1.00    |
| Proteobacteria, Epsilonproteobacteria, Campylobacteriales, Campylobacteraceae, <i>Campylobacter</i>              | 0.0098    | 0.0098 | 0.0000  | 0.0000 | 0.0000  | 0.0000 | 0.0000  | 0.0000 | 1.00                  | -       | 1.00               | -       |
| Proteobacteria, Epsilonproteobacteria, Campylobacteriales, Helicobacteraceae, <i>Helicobacter</i>                | 0.0000    | 0.0000 | 0.0000  | 0.0000 | 0.0003  | 0.0003 | 0.0000  | 0.0000 | 1.00                  | -       | -                  | 1.00    |
| Proteobacteria, Gammaproteobacteria, Other order, Other family, Other genus                                      | 0.0000    | 0.0000 | 0.0003  | 0.0003 | 0.0000  | 0.0000 | 0.0000  | 0.0000 | -                     | 1.00    | 1.00               | -       |
| Proteobacteria, Gammaproteobacteria, Enterobacteriales, Enterobacteriaceae, Other genus                          | 1.6197    | 0.5119 | 1.8257  | 0.9268 | 0.3001  | 0.1212 | 0.1590  | 0.0550 | 1.00                  | 1.00    | 1.00               | 1.00    |
| Proteobacteria, Gammaproteobacteria, Enterobacteriales, Enterobacteriaceae, <i>Citrobacter</i>                   | 0.0897    | 0.0365 | 0.1612  | 0.0601 | 0.0264  | 0.0183 | 0.0121  | 0.0051 | 1.00                  | 1.00    | 1.00               | 1.00    |
| Proteobacteria, Gammaproteobacteria, Enterobacteriales, Enterobacteriaceae, <i>Cronobacter</i>                   | 0.0025    | 0.0013 | 0.0045  | 0.0037 | 0.0003  | 0.0003 | 0.0000  | 0.0000 | 1.00                  | 1.00    | 1.00               | 1.00    |



## Supplementary Table S7. Continued

| Genus                                                                                                   | <i>Bifal</i> +Arg |        |         |        | Placebo |        |         |        | Difference ( <i>p</i> -value) |         |                    |         |
|---------------------------------------------------------------------------------------------------------|-------------------|--------|---------|--------|---------|--------|---------|--------|-------------------------------|---------|--------------------|---------|
|                                                                                                         | Week 0            |        | Week 12 |        | Week 0  |        | Week 12 |        | <i>Bifal</i> +Arg VS. Placebo |         | Week 0 VS. Week 12 |         |
|                                                                                                         | Mean              | SEM    | Mean    | SEM    | Mean    | SEM    | Mean    | SEM    | Week 0                        | Week 12 | <i>Bifal</i> +Arg  | Placebo |
| Proteobacteria, Gammaproteobacteria, Enterobacteriales, Enterobacteriaceae, <i>Edwardsiella</i>         | 0.0079            | 0.0079 | 0.0000  | 0.0000 | 0.0000  | 0.0000 | 0.0003  | 0.0003 | 1.00                          | 1.00    | 1.00               | 1.00    |
| Proteobacteria, Gammaproteobacteria, Enterobacteriales, Enterobacteriaceae, <i>Escherichia/Shigella</i> | 0.2320            | 0.0854 | 0.1107  | 0.0590 | 0.0607  | 0.0274 | 0.0361  | 0.0227 | 1.00                          | 1.00    | 1.00               | 1.00    |
| Proteobacteria, Gammaproteobacteria, Enterobacteriales, Enterobacteriaceae, <i>Klebsiella</i>           | 0.0216            | 0.0102 | 0.0125  | 0.0078 | 0.0089  | 0.0045 | 0.0085  | 0.0055 | 1.00                          | 1.00    | 1.00               | 1.00    |
| Proteobacteria, Gammaproteobacteria, Enterobacteriales, Enterobacteriaceae, <i>Morganella</i>           | 0.0004            | 0.0004 | 0.0006  | 0.0004 | 0.0000  | 0.0000 | 0.0000  | 0.0000 | 1.00                          | 1.00    | 1.00               | -       |
| Proteobacteria, Gammaproteobacteria, Enterobacteriales, Enterobacteriaceae, <i>Proteus</i>              | 0.0004            | 0.0004 | 0.0000  | 0.0000 | 0.0000  | 0.0000 | 0.0000  | 0.0000 | 1.00                          | -       | 1.00               | -       |
| Proteobacteria, Gammaproteobacteria, Enterobacteriales, Enterobacteriaceae, <i>Pseudocitrobacter</i>    | 0.0004            | 0.0004 | 0.0000  | 0.0000 | 0.0000  | 0.0000 | 0.0000  | 0.0000 | 1.00                          | -       | 1.00               | -       |
| Proteobacteria, Gammaproteobacteria, Pasteurellales, Pasteurellaceae, Other genus                       | 0.0000            | 0.0000 | 0.0003  | 0.0003 | 0.0006  | 0.0004 | 0.0003  | 0.0003 | 1.00                          | 1.00    | 1.00               | 1.00    |
| Proteobacteria, Gammaproteobacteria, Pasteurellales, Pasteurellaceae, <i>Haemophilus</i>                | 0.0156            | 0.0062 | 0.0264  | 0.0116 | 0.0621  | 0.0287 | 0.0396  | 0.0249 | 1.00                          | 1.00    | 1.00               | 1.00    |
| Proteobacteria, Gammaproteobacteria, Pseudomonadales, Pseudomonadaceae, Other genus                     | 0.0000            | 0.0000 | 0.0000  | 0.0000 | 0.0002  | 0.0002 | 0.0000  | 0.0000 | 1.00                          | -       | -                  | 1.00    |
| Proteobacteria, Gammaproteobacteria, Pseudomonadales, Pseudomonadaceae, <i>Pseudomonas</i>              | 0.0002            | 0.0002 | 0.0000  | 0.0000 | 0.0000  | 0.0000 | 0.0000  | 0.0000 | 1.00                          | -       | 1.00               | -       |
| Proteobacteria, Gammaproteobacteria, Xanthomonadales, Xanthomonadaceae, <i>Vulcaniibacterium</i>        | 0.0000            | 0.0000 | 0.0000  | 0.0000 | 0.0000  | 0.0000 | 0.0003  | 0.0003 | -                             | 1.00    | -                  | 1.00    |
| Spirochaetes, Spirochaetales, Brachyspiraceae, <i>Brachyspira</i>                                       | 0.0105            | 0.0105 | 0.0033  | 0.0033 | 0.0084  | 0.0080 | 0.0737  | 0.0645 | 1.00                          | 1.00    | 1.00               | 1.00    |
| Synergistetes, Synergistia, Synergistales, Synergistaceae, <i>Cloacibacillus</i>                        | 0.0004            | 0.0004 | 0.0050  | 0.0050 | 0.0002  | 0.0002 | 0.0007  | 0.0005 | 1.00                          | 1.00    | 1.00               | 1.00    |
| Verrucomicrobia, Verrucomicrobiae, Verrucomicrobiales, Verrucomicrobiaceae, <i>Akkermansia</i>          | 0.0280            | 0.0185 | 0.0521  | 0.0319 | 0.0062  | 0.0058 | 0.0065  | 0.0065 | 1.00                          | 1.00    | 1.00               | 1.00    |

Comparisons between the *Bifal*+Arg YG and placebo groups were tested using Mann-Whitney *U* tests. Comparisons at week 0 and at week 12 were tested using Wilcoxon signed rank tests. *p*-values were adjusted using the Benjamini and Hochberg method [1].

## References

1. Benjamini, Y.; Hochberg, Y. Controlling the false discovery rate: a practical and powerful approach to multiple testing. *J. R. Statist. Soc. B (Methodological)* **1995**, 289-300.
